## RESEARCH ARTICLE

# Transcription co-factor LBH is necessary for the survival of cochlear hair cells

Huizhan Liu<sup>1,\*</sup>, Kimberlee P. Giffen<sup>1,\*</sup>, M'Hamed Grati<sup>2</sup>, Seth W. Morrill<sup>1</sup>, Yi Li<sup>1,3</sup>, Xuezhong Liu<sup>2</sup>, Karoline J. Briegel<sup>4,‡</sup> and David Z. He<sup>1,‡</sup>

## ABSTRACT

Hearing loss affects ~10% of adults worldwide. Most sensorineural hearing loss is caused by the progressive loss of mechanosensitive hair cells (HCs) in the cochlea. The molecular mechanisms underlying HC maintenance and loss remain poorly understood. LBH, a transcription co-factor implicated in development, is abundantly expressed in outer hair cells (OHCs). We used *Lbh*-null mice to identify its role in HCs. Surprisingly, *Lbh* deletion did not affect differentiation and the early development of HCs, as nascent HCs in *Lbh* knockout mice had normal looking stereocilia. The stereocilia bundle was mechanosensitive and OHCs exhibited the characteristic electromotility. However, *Lbh*-null mice displayed progressive hearing loss, with stereocilia bundle degeneration and OHC loss as early as postnatal day 12. RNA-seq analysis showed significant gene enrichment of biological processes related to transcriptional regulation, cell cycle, DNA damage/repair and autophagy in *Lbh*-null OHCs. In addition, Wnt and Notch pathway-related genes were found to be dysregulated in *Lbh*-deficient OHCs. Our study implicates, for the first time, loss of LBH function in progressive hearing loss, and demonstrates a critical requirement of LBH in promoting HC survival in adult mice.

**KEY WORDS:** Hair cells, Hearing loss, LBH, Mechanotransduction, RNA-seq, Stereocilia

## INTRODUCTION

There are 466 million people worldwide living with hearing loss, according to World Health Organization estimates (<https://www.who.int/deafness/estimates/en/>). Most sensorineural hearing loss is caused by progressive degeneration of hair cells (HCs) in the cochlea of the inner ear. These cells are specialized mechanoreceptors that transduce mechanical forces transmitted by sound to electrical activities (Hudspeth, 2014; Fettiplace, 2017). HCs in adult mammals are terminally differentiated and unable to regenerate once they are lost due to aging or exposure to noise and

ototoxic drugs. Although HCs have been well characterized morphologically and biophysically, the key molecules that control their differentiation, homeostasis and aging remain to be identified.

Inner and outer HCs (IHCs and OHCs) are the two types of HCs, with distinct morphologies and functions in the mammalian cochlea (Dallos, 1992). IHCs are the true sensory receptor cells and transmit information to the brain, whereas the OHCs are a mammalian innovation with a unique capability of changing their length in response to changes in receptor potential (Brownell et al., 1985). OHC motility is believed to confer the mammalian cochlea with high sensitivity and exquisite frequency selectivity (Liberman et al., 2002; Dallos et al., 2008). We compared cell type-specific transcriptomes of IHC and OHC populations from adult mouse cochleae to identify genes commonly and differentially expressed in these two types of HCs (Liu et al., 2014; Li et al., 2016; Li et al., 2018). Our analysis showed that *Limb-bud-and-heart* (*Lbh*), a transcription co-factor implicated in development (Briegel and Joyner, 2001; Briegel et al., 2005), is expressed in adult IHCs and OHCs. *Lbh* is also expressed in cochlear and vestibular HCs and weakly expressed in some supporting cells (SCs) between embryonic day (E)16 and postnatal day (P)7 (Scheffer et al., 2015; Elkon et al., 2015; Cai et al., 2015; Ranum et al., 2019; Kolla et al., 2020). Furthermore, *Lbh* expression is upregulated during transdifferentiation of SCs to HCs (Ebeid et al., 2017; Yamashita et al., 2018). Transcription factors are proteins that bind to specific DNA motifs to regulate the expression of target genes, whereas transcription co-factors interact with transcription factors to activate or repress the transcription of specific genes. As LBH is a transcription co-factor, we investigated whether LBH is necessary for regulating HC differentiation, development and maintenance. Because *Lbh* is differentially expressed in nascent and adult OHCs (Li et al., 2016; Li et al., 2018; Ranum et al., 2019; Kolla et al., 2020), we also investigated whether LBH plays a role in regulating cell specialization underlying OHC morphology and function.

*Lbh* knockout mice (hereafter referred to as *Lbh*<sup>-/-</sup> or *Lbh*-null mice) have been generated by crossing conditional *Lbh*<sup>lox</sup> mice with a *Rosa26-Cre* line, resulting in an ubiquitous germline deletion of *Lbh* and the abolishment of LBH protein expression during embryonic development (Lindley and Briegel, 2013). In this study, we examined the role of LBH in HCs by comparing changes in morphology, function and gene expression between HCs from *Lbh*-null mice and their wild-type littermates. Results showed that HC differentiation, maturation of mechanotransduction and OHC specialization were unaffected by the loss of LBH. However, stereocilia bundles and HCs, especially OHCs, showed signs of degeneration as early as P12. Moreover, adult *Lbh*-null mice displayed progressive loss of hearing and otoacoustic emissions, suggesting that LBH is critical for the survival of HCs. Cell-specific transcriptome and bioinformatics analyses showed a significant enrichment of genes associated with transcription, cell cycle, DNA damage/repair and autophagy in the

<sup>1</sup>Department of Biomedical Sciences, Creighton University School of Medicine, Omaha, NE 68178, USA. <sup>2</sup>Department of Otorhinolaryngology-Head and Neck Surgery, University of Miami Miller School of Medicine, Miami, FL 33136, USA. <sup>3</sup>Department of Otorhinolaryngology-Head and Neck Surgery, Beijing Tongren Hospital, Capital Medical University, 100730 Beijing, China. <sup>4</sup>Department of Surgery, University of Miami Miller School of Medicine, Miami, FL 33136, USA. \*These authors contributed equally to this work

<sup>‡</sup>Authors for correspondence (KBriegel@med.miami.edu; hed@creighton.edu)

 H.L., 0000-0003-2400-3284; K.P.G., 0000-0001-9332-3498; M.G., 0000-0001-5149-3245; S.W.M., 0000-0001-5148-8243; Y.L., 0000-0002-9986-6546; X.L., 0000-0002-4758-6470; K.J.B., 0000-0003-2661-509X; D.Z.H., 0000-0001-8383-9634

Handling Editor: Andrew Ewald

Received 15 September 2020; Accepted 11 February 2021

*Lbh*-null OHCs. Wnt and Notch pathway-related genes, known for their important roles in regulating HC differentiation and regeneration in vertebrate HCs (Raft and Groves, 2015; Waqas et al., 2016), were found to be dysregulated. Our study implicates, for the first time, the loss of transcription co-factor LBH function in progressive hearing loss, and demonstrates a critical requirement of LBH in promoting cochlear HC survival.

## RESULTS

### LBH mRNA and protein are highly expressed in cochlear HCs

*Lbh* gene expression in HCs and SCs in the adult murine organ of Corti was examined using our published cell type-specific RNA-seq data sets (Liu et al., 2018). This analysis showed that *Lbh* mRNA was

expressed in all four cell types of the adult cochlea, IHCs, OHCs, pillar cells and Deiters' cells; however, *Lbh* transcript levels were highest in OHCs (Fig. 1A, top left panel). This pattern of expression is consistent with single-cell RNA-seq data (Ranum et al., 2019; Kolla et al., 2020). We also examined *Lbh* expression during development using bulk and single-cell RNA-seq data sets from published studies (Scheffer et al., 2015; Elkton et al., 2015; Cai et al., 2015; Ranum et al., 2019; Kolla et al., 2020). As shown in Fig. 1A (bottom panels), *Lbh* was abundantly expressed in cochlear and vestibular HCs at E16 and upregulated at P7. In contrast, *Lbh* levels remained low in SCs compared to HCs (Fig. 1A, bottom panels). Taken together, these studies show that *Lbh* expression is substantially higher in HCs than in SCs during development and in adulthood.

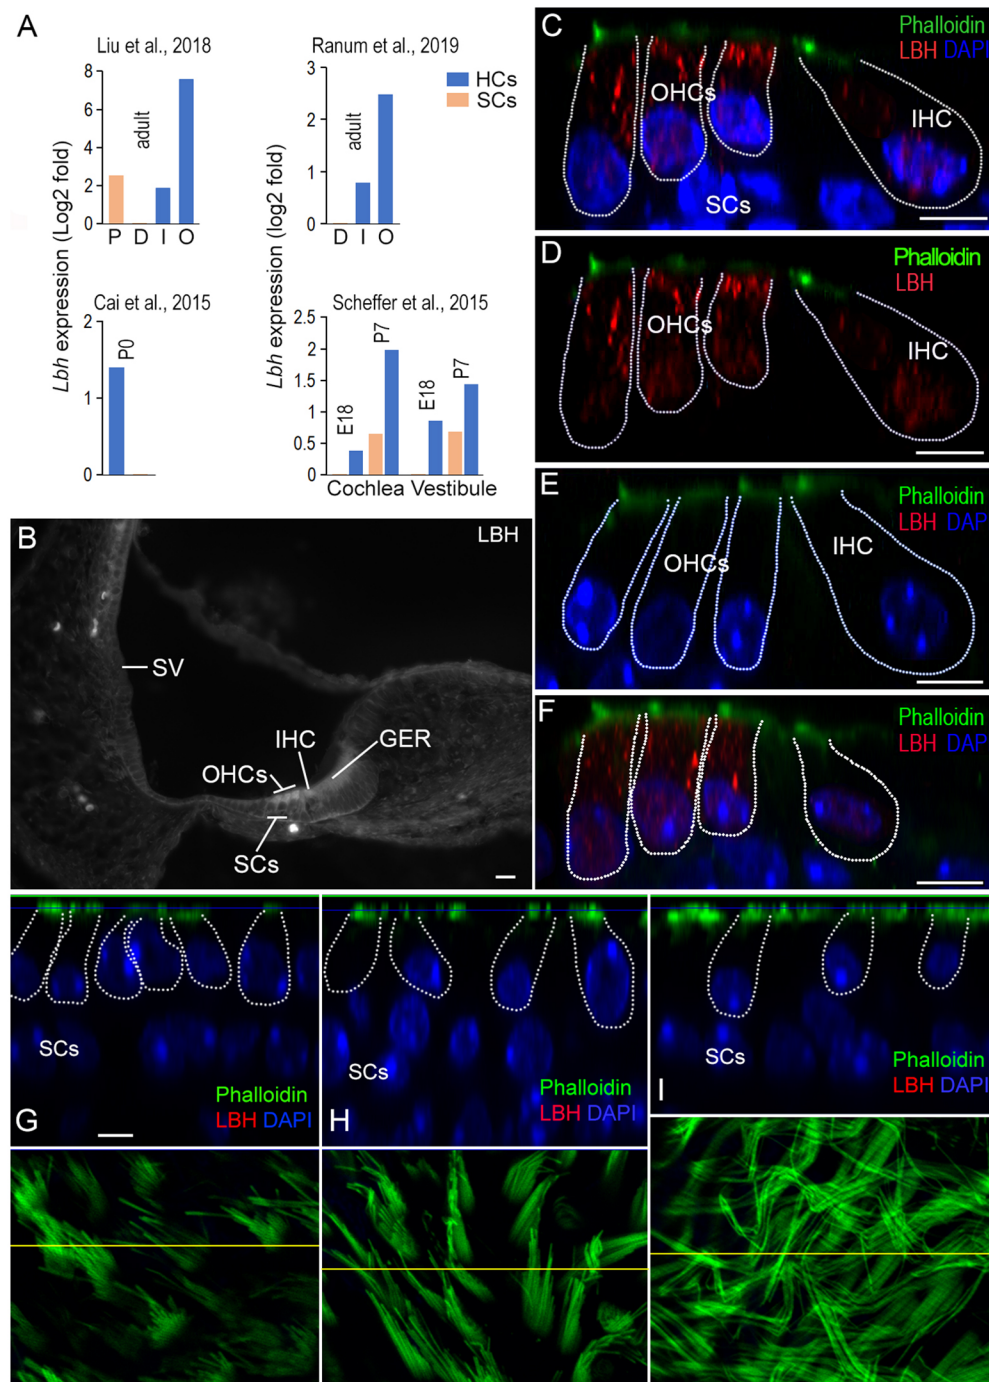

**Fig. 1. Expression of LBH in cochlear and vestibular HCs.**

(A) Cell type-specific expression of *Lbh* mRNA in HCs and SCs from four published RNA-seq data sets. The expression RPKM value of SCs was used as reference.

(B) Fluorescent microscopy picture of antibody staining of LBH protein in a cryosection of the cochlea from a P3 wild-type mouse. The stria vascularis (SV), IHCs, OHCs and greater epithelium ridge (GER) are marked. (C,D) LBH expression (red) in the organ of Corti from a P12 wild-type mouse using confocal optical sectioning with (C) and without DAPI (D). LBH expression was observed in the cytosol and nuclei of IHCs and OHCs. (E) Lack of LBH protein expression in hair cells in a P12 *Lbh*-null mouse. (F) LBH expression in P30 cochlear HCs from wild-type mouse. (G-I) Optical section of the saccule, utricle and crista from an adult wild-type mouse. The HCs are outlined and nuclei of SCs are indicated. Phalloidin staining of stereocilia bundles of HCs in the saccule, utricle and crista are presented in the bottom panels. The yellow lines in each panel indicate where the optical section was made. Scale bars: 10  $\mu$ m (B); 5  $\mu$ m (C-I).

We next used LBH-specific antibodies to examine LBH protein expression in inner ears from neonatal and adult C57BL/6 mice. Fig. 1B shows a micrograph obtained from a cryosection of a P3 cochlea. LBH was expressed in both OHCs and IHCs, with no obvious expression in SCs (Fig. 1B). LBH positivity was also detected in some cells in the greater epithelial ridge at this stage. In P12 cochlea, LBH was still expressed in both IHCs and OHCs; however, expression was stronger in OHCs (Fig. 1C). Of note, LBH was predominately cytoplasmic, although weaker expression was also seen in the nuclei (Fig. 1C,D). In the age-matched *Lbh*-null mice, no LBH protein was detected in IHCs and OHCs (Fig. 1E), confirming specificity of LBH expression in these cells, as well as deletion of LBH function in these mice (Lindley and Briegel, 2013). Robust LBH expression persisted in adult OHCs, whereas LBH expression in IHCs remained weak (Fig. 1F). This pattern of expression is consistent with the predominant expression of *Lbh* mRNA in adult OHCs (Liu et al., 2014; Li et al., 2016; Li et al., 2018; Ranum et al., 2019; Kolla et al., 2020). Interestingly, no LBH immunopositivity was detected in HCs of saccule, utricle and crista in the vestibular end organs in neonatal and adult mice (Fig. 1G-I). Thus, LBH appears to be only expressed in cochlear HCs.

### Auditory function of *Lbh*-mutant mice indicates progressive hearing loss

To determine whether LBH expression in cochlear HCs is required for hearing, we examined auditory function in *Lbh*-null mice by measuring auditory brainstem response (ABR). In *Lbh*-null mice (mixed 129/SvEv and C57BL/6 background), *Lbh* was ubiquitously deleted during embryonic development, and the absence of LBH protein expression was validated by western blot and negative LBH

antibody staining in mammary glands (Lindley and Briegel, 2013). Lack of LBH expression in HCs of *Lbh*-null mice is presented in Fig. 1D. Fig. 2A shows the ABR thresholds of homozygous (*Lbh*<sup>-/-</sup>), heterozygous (*Lbh*<sup>+/-</sup>) and wild-type (*Lbh*<sup>+/+</sup>) mice at 1 month of age. As shown, the threshold of *Lbh*<sup>-/-</sup> mice was elevated by ~10 dB at lower frequencies to ~40 dB in higher frequencies relative to their wild-type littermates. The ABR thresholds of *Lbh*<sup>-/-</sup> mice at 8 kHz and above were significantly elevated compared to *Lbh*<sup>+/+</sup> mice. Heterozygous *Lbh*<sup>+/-</sup> mice also showed 10 to 25 dB hearing loss at higher frequencies when compared with the wild-type controls. The significant elevation of ABR thresholds between *Lbh*<sup>+/-</sup> and *Lbh*<sup>+/+</sup> mice at 22 kHz and above, suggests that a single functional allele is insufficient to retain normal hearing function. We next measured distortion product otoacoustic emission (DPOAE) thresholds at 8, 16 and 32 kHz in these mice. DPOAEs are generated by motor activity of OHCs (Liberian et al., 2002; Dallos et al., 2008) and reflect OHC function and condition. Similar to ABR thresholds, DPOAE thresholds (Fig. 2B) were also elevated at 32 kHz in *Lbh*<sup>-/-</sup> and *Lbh*<sup>+/-</sup> mice. We further measured cochlear microphonic (CM) in response to an 8 kHz tone burst in *Lbh*<sup>-/-</sup> and *Lbh*<sup>+/+</sup> mice. The CM is a receptor potential believed to be generated primarily by OHCs (Dallos, 1992). A significant reduction of the CM magnitude was observed in *Lbh*<sup>-/-</sup> mice ( $P=4.29\times 10^{-6}$ ,  $n=6$ ) (Fig. 2C). As weak expression of *Lbh* was detected in the intermediate cells of the stria vascularis during development (Liu et al., 2018), we measured endocochlear potential (EP) in 1-month-old *Lbh*<sup>-/-</sup> and *Lbh*<sup>+/+</sup> mice to determine whether stria development and function are affected by the deletion of *Lbh*. This is necessary as stria function (i.e. EP) can influence HC survival (Liu et al., 2016). The mean magnitude of EP was  $100.6\pm 2.3$  mV for *Lbh*<sup>-/-</sup> and  $90.5\pm 2.6$  mV for *Lbh*<sup>+/+</sup> mice

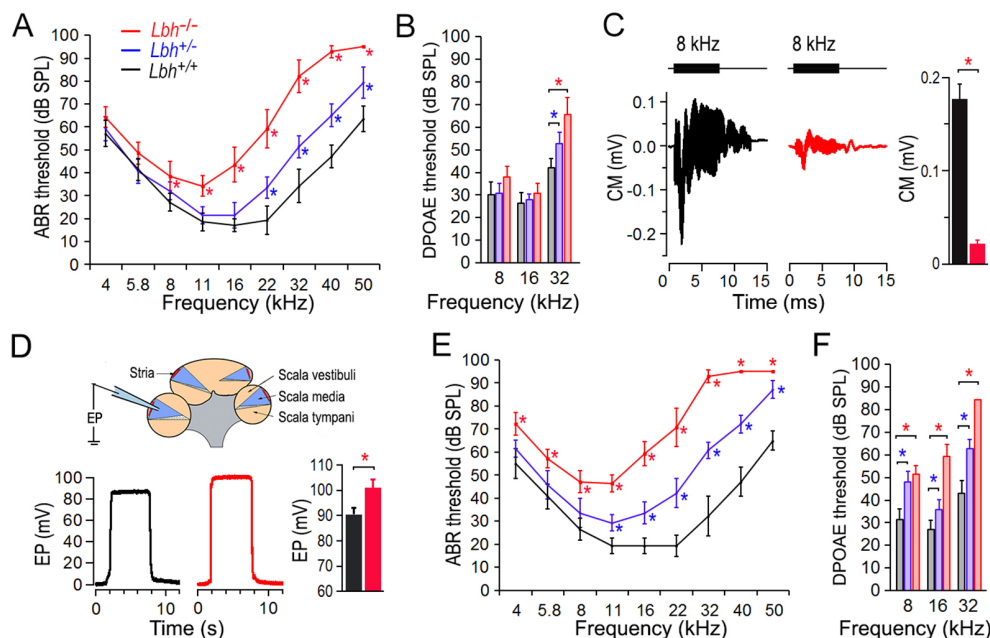

**Fig. 2. Auditory function of *Lbh*-mutant mice.** (A) ABR thresholds of *Lbh*<sup>-/-</sup>, *Lbh*<sup>+/-</sup> and *Lbh*<sup>+/+</sup> mice (color-coded) at 1 month of age. Eight mice for each genotype from three different litters were used. (B) DPOAE thresholds at 1 month ( $n=7$  for each genotype). (C) Representative CM responses obtained from *Lbh*<sup>-/-</sup> and *Lbh*<sup>+/+</sup> mice. Tone bursts (8 kHz, 80 dB SPL) were used to evoke the response. The mean of peak-to-peak magnitude of the CM was  $0.021\pm 0.0035$  mV (s.d.) and  $0.177\pm 0.015$  mV, respectively, for the *Lbh*<sup>+/+</sup> and *Lbh*<sup>-/-</sup> mice ( $n=6$  per genotype) between the two genotypes. (D) Representative EP measured from *Lbh*<sup>-/-</sup> and *Lbh*<sup>+/+</sup> mice at 1 month. The mean of EP magnitude was  $90.5\pm 2.6$  mV (*Lbh*<sup>+/+</sup>) and  $100.6\pm 2.3$  mV (*Lbh*<sup>-/-</sup>) ( $n=6$  per genotype). (E) ABR thresholds at 3 months ( $n=7$  for each genotype). (F) DPOAE thresholds at 3 months ( $n=7$  for each genotype). For all ABR and DPOAE comparisons, a two-way ANOVA with multiple *t*-tests was used. Data are mean $\pm$ s.d. \* $P\leq 0.05$  is the threshold (at these frequencies) or the magnitude of the response that is statistically significant compared with *Lbh*<sup>+/+</sup> mice ( $n=7$  for each genotype). The reported *P*-value is the adjusted *P*-value.



(Fig. 2D;  $P=2.92 \times 10^{-4}$ ,  $n=6$ ). This increase is likely due to loss of HCs, which diminished the leaky transduction current and increased the resistance between the scala media and scala tympani, leading to an increase in EP (Zhang et al., 2014). The fact that no EP reduction was observed suggests that loss of LBH does not affect stria function. Finally, ABR and DPOAE measurements at 3 months of age showed that the thresholds were further elevated in both *Lbh*<sup>-/-</sup> and *Lbh*<sup>+/-</sup> mice (Fig. 2E,F), indicating that LBH deficiency causes progressive hearing loss.

### Morphological changes of HCs in *Lbh*<sup>-/-</sup> mice

We next investigated whether there was progressive HC loss in *Lbh*-deficient mice. To this end, we examined HC loss at the base and apex of the cochleae at four different ages in *Lbh*<sup>-/-</sup> and *Lbh*<sup>+/+</sup> mice ( $n=3$  each). Fig. 3A shows representative confocal images at P12 and 4 months. The total number of IHCs and OHCs at the two cochlear locations was counted. Fig. 3B shows the HC count and percentage of surviving IHCs and OHCs at P3, P12, 1 and 4 months. No HC loss was apparent at either location in P3 *Lbh*<sup>-/-</sup> or *Lbh*<sup>+/+</sup> cochleae. At P12, *Lbh*<sup>-/-</sup> cochleae exhibited sporadic OHC loss in the basal turn region. At 1 month, more OHC loss was seen in the basal turn region, and sporadic OHC loss was also seen in the apical turn (Fig. 3B). Finally, more OHCs were lost in both apical and basal turns at 4 months, with only ~24% of OHCs remaining in the basal turn region of *Lbh*<sup>-/-</sup> cochleae (Fig. 3B). IHCs survived in the basal and apical turns, despite OHC loss. At 4 months, some IHC loss (~8%) was seen in the basal turn. We also examined Deiters' cell survival in a mid-cochlear region in which 50% of OHCs were lost at 4 months (Fig. 3C-E). As shown in Fig. 3D,E, the Deiters' cells were still present despite loss of OHCs, suggesting that deletion of *Lbh* has no direct impact on the survival of Deiters' cells. We also examined HC survival in the vestibular end organs at 3 months (Fig. 3F,G), but did not find any noticeable HC loss in the utricle and crista ampullaris of *Lbh*<sup>-/-</sup> mice. Representative high magnification images of utricle HCs are shown in Fig. 3H,I.

Scanning electron microscopy was used to examine stereocilia bundle morphology in *Lbh*<sup>-/-</sup> mice to determine whether LBH is necessary for the morphogenesis and maintenance of stereocilia, and for the differentiation of IHCs and OHCs. Fig. 4A shows an electron micrograph of stereocilia bundles in a P5 *Lbh*<sup>-/-</sup> cochlea. The characteristic one row of IHC and three rows of OHC stereocilia bundles were well organized and properly oriented. The stereocilia were arranged in a normal staircase fashion, with OHCs (Fig. 4B) and IHCs (Fig. 4C) having distinct morphologies when examined at higher magnification (Fig. 4B,C). Thus, no signs of abnormality or degeneration of stereocilia bundles were visible at P5. We also examined stereocilia bundle morphology of *Lbh*<sup>+/+</sup> and *Lbh*<sup>-/-</sup> mice at 1 month and representative images are presented from Fig. 4D-J. As shown in Fig. 4D,E, no signs of stereocilia bundle degeneration and loss were observed in *Lbh*<sup>+/+</sup> mice. In *Lbh*<sup>-/-</sup> cochleae, stereocilia bundles in the apical turn appeared largely normal (Fig. 4F), although sporadic OHC stereocilia bundle loss was observed (asterisk in Fig. 4F). However, degeneration and loss of OHC stereocilia bundles in the basal turn were more pronounced (Fig. 4G). Some of the remaining bundles showed signs of degeneration, such as absorption (marked by arrows in Fig. 4H), corruption and recession of the stereocilia on the edge of the bundle (Fig. 4I). Although the majority of IHC stereocilia bundles in the basal turn were present (Fig. 4G), some signs of IHC degeneration (such as fusion of the stereocilia in Fig. 4G,J) were also observed. The fact that the stereocilia bundles of IHCs and OHCs looked

normal in P5 *Lbh*<sup>-/-</sup> mice suggests that LBH is not essential for morphogenesis of the stereocilia bundle. However, degeneration and loss of stereocilia bundles in adult *Lbh*<sup>-/-</sup> HCs suggest that the survival of HCs, especially OHCs, depends on LBH.

### Mechanotransduction and electromotility of OHCs in *Lbh*<sup>-/-</sup> mice were not significantly changed

We investigated whether LBH plays a role in the development of mechanotransduction apparatus as LBH expression was upregulated in HCs. The voltage-clamp technique was used to measure the mechano-electrical transduction (MET) current of OHC stereocilia bundles in response to bundle deflection in *Lbh*<sup>-/-</sup> mice. A coil preparation from the mid-cochlear region was used for recording (Jia and He, 2005). The bundle was deflected using the fluid jet technique (Kros et al., 1992; Jia et al., 2009) and the deflection-evoked MET current was recorded (Fig. 5A). Two examples of the maximal MET current from OHCs of *Lbh*<sup>-/-</sup> and *Lbh*<sup>+/+</sup> mice at P12 are shown in Fig. 5A. We compared maximal MET currents obtained from nine and eight OHCs from four *Lbh*<sup>+/+</sup> and four *Lbh*<sup>-/-</sup> mice, respectively. The magnitude of the current was  $614 \pm 90$  pA (mean  $\pm$  s.d.) for *Lbh*<sup>+/+</sup> and  $449 \pm 57$  pA for *Lbh*<sup>-/-</sup> OHCs. Despite a significant reduction ( $P=4.8 \times 10^{-4}$ ), the presence of MET current suggests that the mechanotransduction apparatus is functional in *Lbh*<sup>-/-</sup> OHCs.

Prestin-based somatic motility is a unique property of OHCs (Zheng et al., 2000). As LBH is predominantly expressed in OHCs, we investigated whether LBH regulates prestin expression. OHC electromotility occurs after birth (He et al., 1994; He, 1997); thus, we measured non-linear capacitance (NLC), an electric signature of electromotility (Ashmore, 1989; Santos-Sacchi, 1991; He et al., 2010), from *Lbh*<sup>-/-</sup> OHCs at P12 when OHC degeneration was still mild. Fig. 5B shows NLC measured from OHCs isolated from the mid-cochlear region in *Lbh*<sup>-/-</sup> and *Lbh*<sup>+/+</sup> mice. A two-state Boltzmann function relating non-linear charge movement to voltage (Santos-Sacchi, 1991; He et al., 2010) was used to compute four parameters: the maximum charge transferred through the membrane's electric field ( $Q_{\max}$ ); the slope factor of the voltage dependence ( $\alpha$ ); the voltage at peak capacitance ( $V_{\text{pkcm}}$ ); and the linear membrane capacitance ( $C_{\text{lin}}$ ). No significant differences in any of these parameters were found between *Lbh*<sup>-/-</sup> and *Lbh*<sup>+/+</sup> OHCs (Fig. 5B). Thus, OHC motility does not appear to be affected by loss of LBH.

### Changes in OHC gene expression after deletion of *Lbh*

To identify the molecular mechanism underlying the observed hearing and HC loss in *Lbh*-null mice, we performed OHC-specific RNA-seq transcriptome analyses. Although IHC degeneration and loss were also seen in *Lbh*-null mice, OHC degeneration and loss were more prominent. OHCs were isolated from P12 *Lbh*<sup>-/-</sup> and *Lbh*<sup>+/+</sup> mice (Fig. 6A), as HC degeneration in *Lbh*-null mice had just begun at this stage (Fig. 3). The normalized RPKM values are provided as Table S1. Fig. 6B shows a correlation between the datasets by Euclidean distance in a heatmap of 10,000 genes with a cutoff  $z$ -score calculated as the absolute values from the mean. Comparison of the gene expression profiles between *Lbh*<sup>-/-</sup> and *Lbh*<sup>+/+</sup> OHCs identified 2779 differentially upregulated and 2065 downregulated genes {defined as those with  $\geq 1.0$  log<sub>2</sub> fold change in expression between the two cell types with statistical significance [false discovery rate (FDR)  $P \leq 0.05$ ]} in *Lbh*<sup>-/-</sup> OHCs (Fig. 6C; Table S2). Among those genes, biological processes related to gene expression, protein metabolic process and organelle organization were significantly enriched in *Lbh*<sup>-/-</sup> OHCs, as assessed by



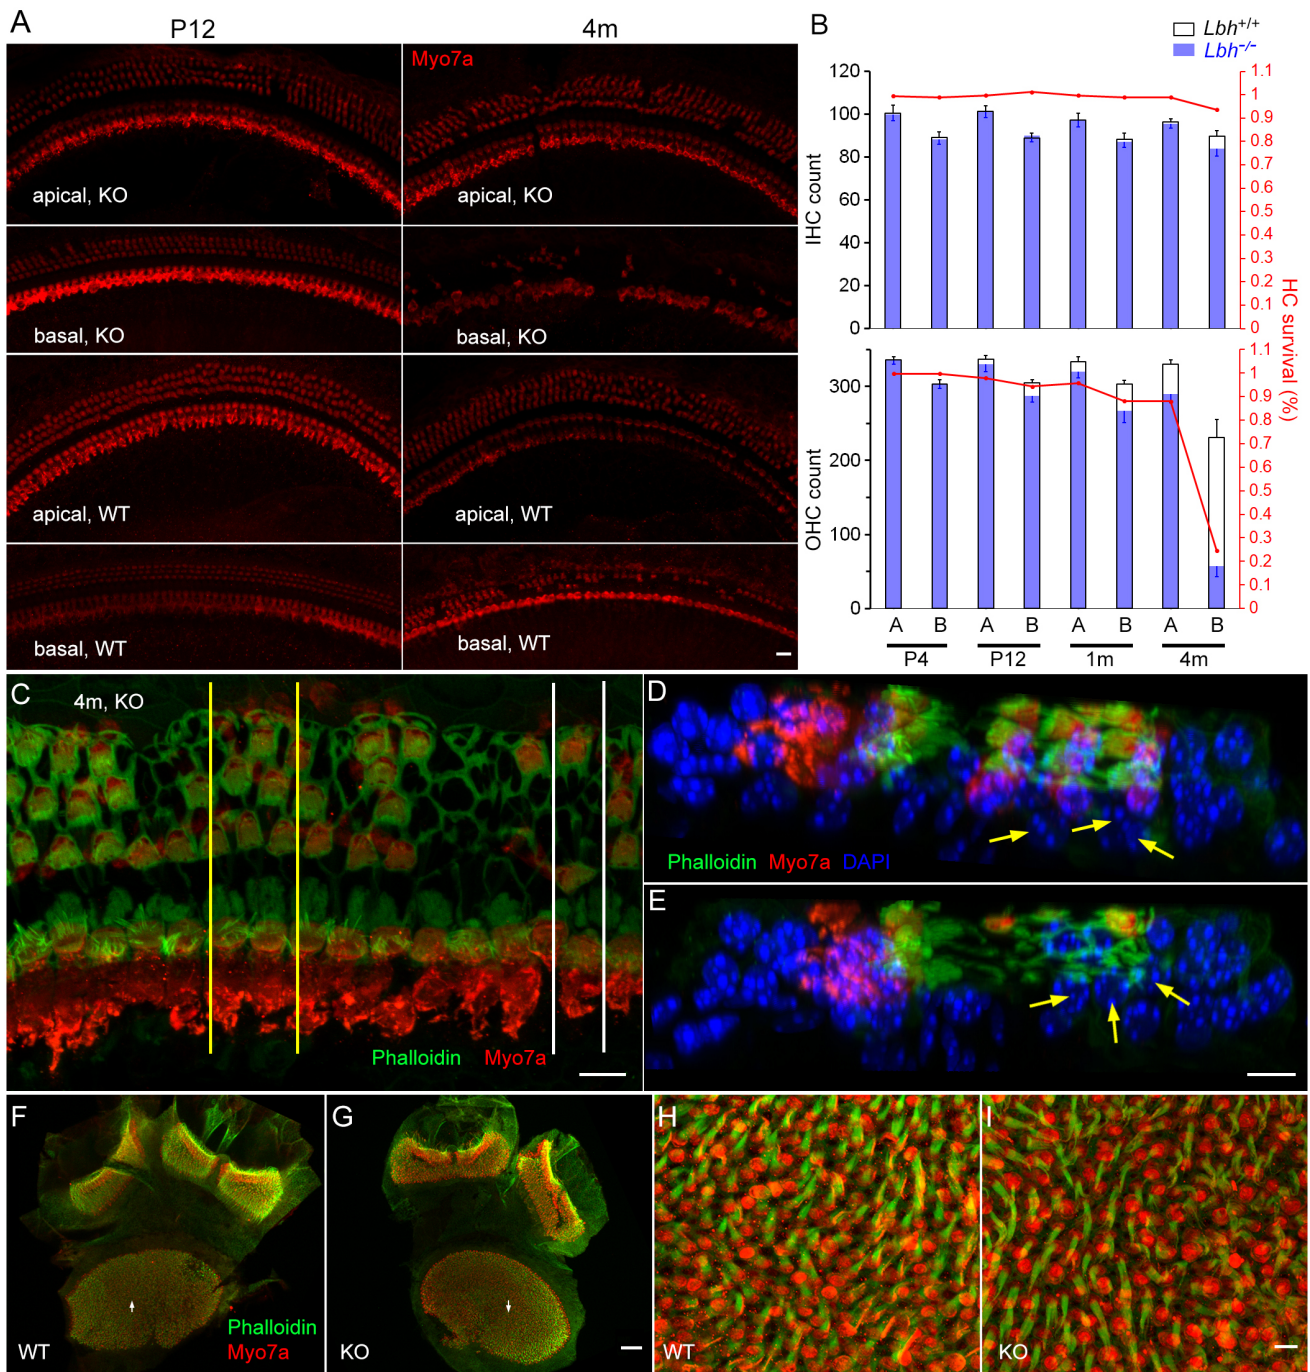

**Fig. 3. HC survival in the cochlear and vestibular sensory epithelia.** (A) Representative confocal micrographs of HCs from an apical and a basal region in the cochleae of *Lbh*<sup>-/-</sup> and *Lbh*<sup>+/+</sup> mice at P12 and 4 months. (B) IHC and OHC count from the two apical and basal areas (~4.5 and 1.4 mm from the hook, each with 850  $\mu$ m in length) of three *Lbh*<sup>-/-</sup> and three *Lbh*<sup>+/+</sup> mice at P3, P12, 1 and 4 months. HC count from age marched *Lbh*<sup>+/+</sup> mice was used as a reference and is presented as percentage of HC survival. A represents apical turn and B represents basal turn HCs in the plot. (C) Confocal image obtained from a 4-month-old *Lbh*<sup>-/-</sup> cochlea. Yellow lines and white lines mark the areas that were optical sectioned and are presented in D and E. (D,E) Optical sections of the two areas in C. Deiter's cells' nuclei are marked by yellow arrows. The nuclei of Deiter's cells are still present at this stage despite the loss of OHCs. (F,G) Utricle macula and crista ampullaris of *Lbh*<sup>+/+</sup> and *Lbh*<sup>-/-</sup> mice at 3 months. (H,I) Higher magnification images of areas marked by arrows in F and G. Scale bars: 10  $\mu$ m (A,C-E,H,I); 50  $\mu$ m (F,G).

ShinyGO analysis (Fig. 6D,E). In contrast, *Lbh*<sup>+/+</sup> OHCs showed greater enrichment in genes associated with cytoskeletal and actin filament organization, membrane-bound cell projection organization, anatomical structure morphogenesis, RNA splicing and axon ensheathment (Fig. 6E).

Additionally, gene set enrichment analysis (GSEA) was performed using the Broad Institute software. Enriched pathways in *Lbh*<sup>-/-</sup> compared to *Lbh*<sup>+/+</sup> OHCs, including Wnt and Notch signaling pathways (Table S3), cell cycle regulation (Table S4), regulation of nucleic acid-templated transcription (Table S4), DNA



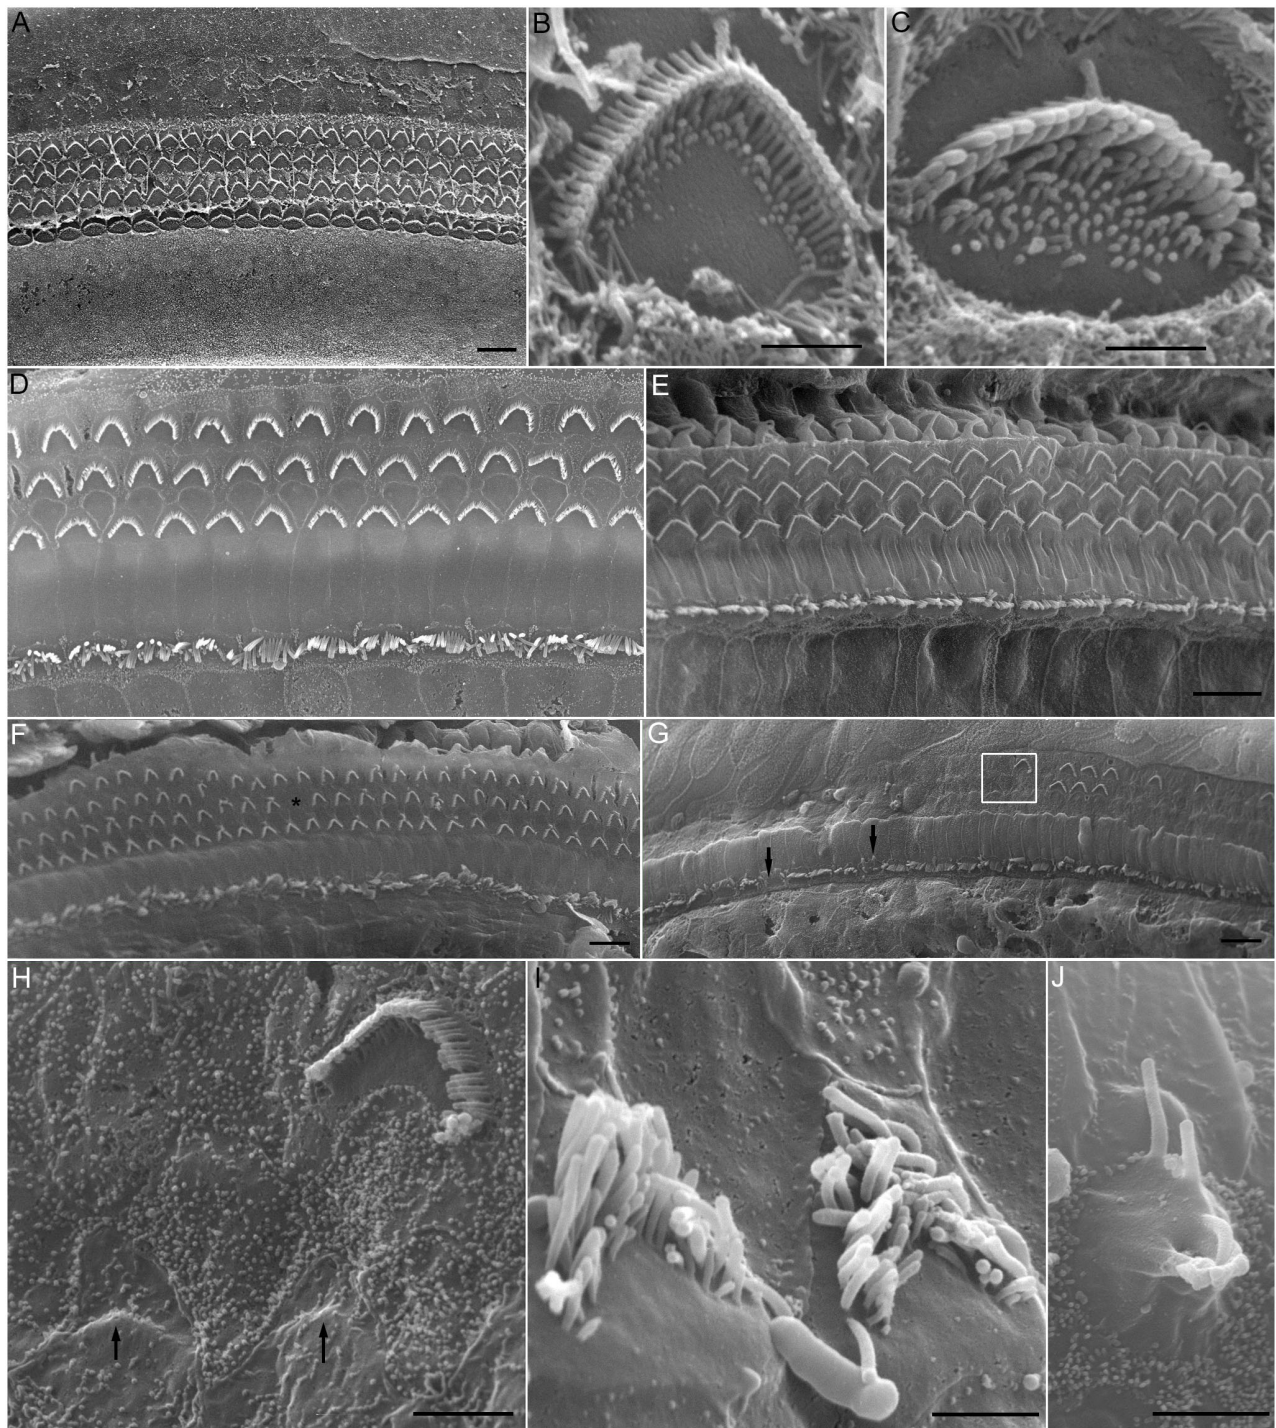

**Fig. 4. Scanning electron micrographs of stereocilia bundles of cochlear HCs in *Lbh*<sup>-/-</sup> null mice.** (A) Micrograph of stereocilia bundles from the low-apical region of a cochlea at P5. (B,C) Higher magnification images of the stereocilia bundle of an OHC (B) and an IHC (C) from the basal turn of the same cochlea shown in panel A. (D,E) Micrographs of stereocilia bundles from mid-apical turn and basal turn of 1-month-old wild-type mouse. (F,G) Micrographs of stereocilia bundles from an apical turn region (F) and basal turn region (G) from a 1-month-old *Lbh*<sup>-/-</sup> mouse. Asterisk marks a missing OHC, and black arrows mark signs of degeneration of stereocilia bundles, such as fusion of stereocilia. A magnified image of the area within the white frame is highlighted in panel H. (H-J) Representative images of degenerating stereocilia bundles of OHCs (H,I) and an IHC (J) from mid-basal turn region of a 1-month-old *Lbh*<sup>-/-</sup> mouse. Black arrows in panel H indicate the complete absorption of stereocilia bundles due to degeneration. Scale bars: 10  $\mu\text{m}$  (A,D-G); 1  $\mu\text{m}$  (B,C); 2  $\mu\text{m}$  (H); 1.5  $\mu\text{m}$  (I); and 2.5  $\mu\text{m}$  (J).

damage/repair and autophagy (Table S5) are presented in Fig. 7. As Wnt and Notch play important roles in HC differentiation and regeneration, and LBH is a Wnt target gene known to regulate cell differentiation states in other cell types (Conen et al., 2009; Rieger

et al., 2010; Lindley et al., 2015; Li et al., 2015), the expression of genes related to Wnt and Notch signaling was examined in more detail. Although *Notch1* (although not among the top 20 presented in Fig. 7), *Wnt4*, *Fzd4*, *Ctnnb1* ( $\beta$ -catenin) and *Fuz* were all

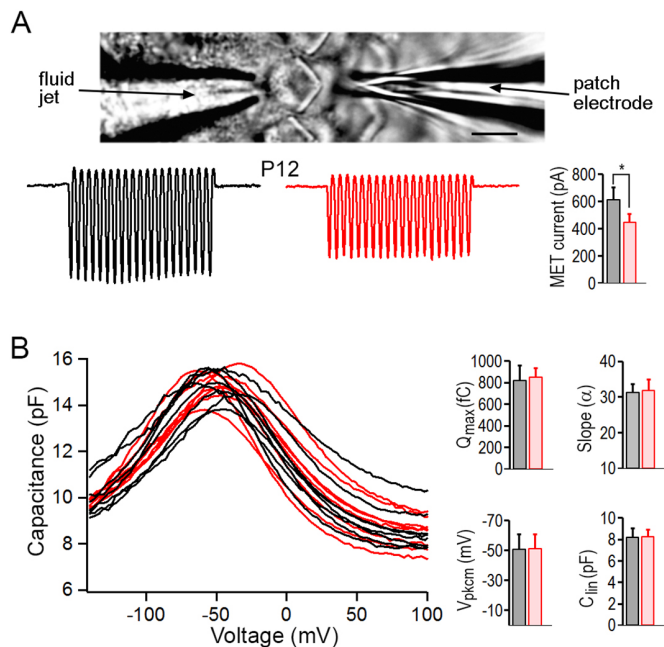

**Fig. 5. OHC function examined using whole-cell voltage-clamp technique.** (A) Recording of MET current *in vitro* and representative MET current recorded from OHCs in lower apical turn of *Lbh*<sup>-/-</sup> (red) and *Lbh*<sup>+/+</sup> (black) mice at P12. \* $P < 0.05$ . Scale bar: 5  $\mu$ m. (B) NLC measured from 9 and 8 OHCs in the lower apical turn of *Lbh*<sup>-/-</sup> (red) and *Lbh*<sup>+/+</sup> (black) mice, respectively, at P12. Curve fitting using a two-states Boltzmann function yielded four parameters:  $Q_{max}$ ; slope ( $\alpha$ );  $V_{pkcmi}$ ; and  $C_{iin}$ . Data are mean  $\pm$  s.d.  $P = 0.29, 0.33, 0.47$  and  $0.42$ , respectively, for the four parameters (one-tailed distribution, two-sample unequal variance Student's *t*-tests).

significantly upregulated, some key target genes of Wnt (e.g. *Axin2*, *Lgr5* and *Lrp6*) and Notch (i.e. *Hey1* and *Hey2*) that mirror signaling activity, were downregulated in *Lbh*-null OHCs (Fig. 7A, B). For cell cycle control, 192 genes were upregulated and 107 were downregulated (Fig. 7C). Analysis of transcription factors showed that 430 and 281 transcription factors were upregulated or downregulated in the *Lbh*<sup>-/-</sup> OHCs, respectively (Fig. 7D). The top ten upregulated transcription factors include *Spp1*, *Six2*, *Gps2*, *Ercc6*, *Snx6*, *Tob1*, *Hsph1*, *Pcbp1*, *Ing1* and *Noc2l*; whereas the top ten downregulated are *Plscr1*, *Rarb*, *Per2*, *Gmnn*, *Map3k5*, *Arrb1*, *Rgmb*, *Bcl6*, *Tead1* and *Eif2ak3*. As LBH is implicated in DNA damage/repair in some cells (Deng et al., 2010; Matsuda et al., 2017), the enrichment in these genes was also analyzed (Fig. 7E,F). Ninety and 55 genes associated with DNA damage/repair were upregulated and downregulated in *Lbh*<sup>-/-</sup> OHCs, respectively. Interestingly, autophagy-related genes were also found to be enriched, whereby 81 genes were upregulated and 46 were downregulated in *Lbh*<sup>-/-</sup> OHCs. Tables S2-S5 include the differentially expressed genes and significantly enriched genes associated with Wnt and Notch signaling, transcription, cell cycle, DNA damage/repair and autophagy in the *Lbh*-null OHCs.

RT-qPCR was used to validate selected differentially expressed genes (between P12 *Lbh*<sup>-/-</sup> and *Lbh*<sup>+/+</sup> OHCs) identified by the RNA-seq analysis. Seventeen genes involved in key biological processes related to HC maintenance/degeneration were chosen for comparison. As shown in Fig. 7G, the trend of differential expression of these genes is highly consistent between RNA-seq analyses and RT-qPCR, confirming LBH-dependent gene expression changes in the global RNA-seq analysis.

## DISCUSSION

LBH, a transcriptional regulator highly conserved in evolution from zebrafish to human, is implicated in the development of heart (Briegel and Joyner, 2001; Briegel et al., 2005; Al-Ali et al., 2010), bone (Conen et al., 2009) and mammary gland (Lindley et al., 2015). A zebrafish LBH homologue, *lbh-like*, is necessary for photoreceptor differentiation Li et al., 2015). Here, we identified a novel role for LBH in the maintenance of the adult auditory sensory epithelium.

Unlike in heart, bone, mammary gland and eye development, in which LBH or *lbh-like* proteins control progenitor/stem cell fate, self-renewal and/or differentiation, LBH does not appear to be critical for cochlear HC differentiation, specification and stereocilia morphogenesis. This is supported by the fact that morphologically distinct IHCs and OHCs were present in *Lbh*-null cochleae before P12. Stereocilia bundles of *Lbh*-null HCs appeared normal and were functional, as mechanical stimulus was able to evoke MET currents. Furthermore, LBH is not necessary for the expression of prestin to confer electromotility, a specialization of OHCs (Zheng et al., 2000; He et al., 2014). Therefore, we conclude that LBH is not necessary for stereocilia morphogenesis and HC differentiation, specification and development.

However, we found that LBH is critical for stereocilia bundle maintenance and HC survival in adult mice. When *Lbh* was deleted, stereocilia and HCs began to degenerate as early as P12. The degeneration was progressive from OHCs to IHCs and from cochlear base to apex, similar to the pattern seen during age-related hearing loss in some animal models, such as C57BL/6 mice. Consistent with these morphological changes, gene pathways of actin filament and cell projection organization underlying stereocilia maintenance were upregulated in the wild-type OHCs but not in the *Lbh*-null OHCs. Our findings, to the best of our knowledge, are the first demonstration that loss of LBH causes degeneration of cochlear HCs, leading to progressive hearing loss. Furthermore, these results provide evidence that LBH is required for adult tissue maintenance. Although LBH has been previously implicated in tissue maintenance and the regeneration of the postnatal mammary gland by promoting the self-renewal and maintenance of the basal mammary epithelial stem cell pool (Lindley et al., 2015), HCs are different because they are terminally differentiated postmitotic cells that have lost the ability to proliferate and regenerate. In this regard, it is worth noting that the loss of LBH is also associated with Alzheimer's, a neurodegenerative disease affecting postmitotic neurons (Yamaguchi-Kabata et al., 2018). Thus, LBH appears to be required for tissue maintenance in both regenerative and non-regenerative adult tissues.

OHC-specific RNA-seq and bioinformatic analyses examined the potential molecular mechanisms underlying HC degeneration after *Lbh* deletion. Our analyses showed that a greater number of genes were upregulated in *Lbh*-null OHCs compared to wild-type littermate OHCs. Importantly, genes and pathways associated with transcriptional regulation, cell cycle, DNA repair/maintenance and autophagy, as well as Wnt and Notch signaling, were significantly enriched in *Lbh*-null OHCs. Notch and Wnt signaling are known to be critical for the differentiation and specification of HCs and SCs during inner ear morphogenesis and development (Raft and Groves, 2015). Although Notch and Wnt signaling are known to be downregulated in the inner ear after birth (Kiernan, 2013), low level expression of Notch and Wnt signaling is still necessary for the survival for HCs. As normal adult OHCs retain low levels of Notch and Wnt signaling, we speculate that LBH is required for maintaining low level Notch and Wnt activity in



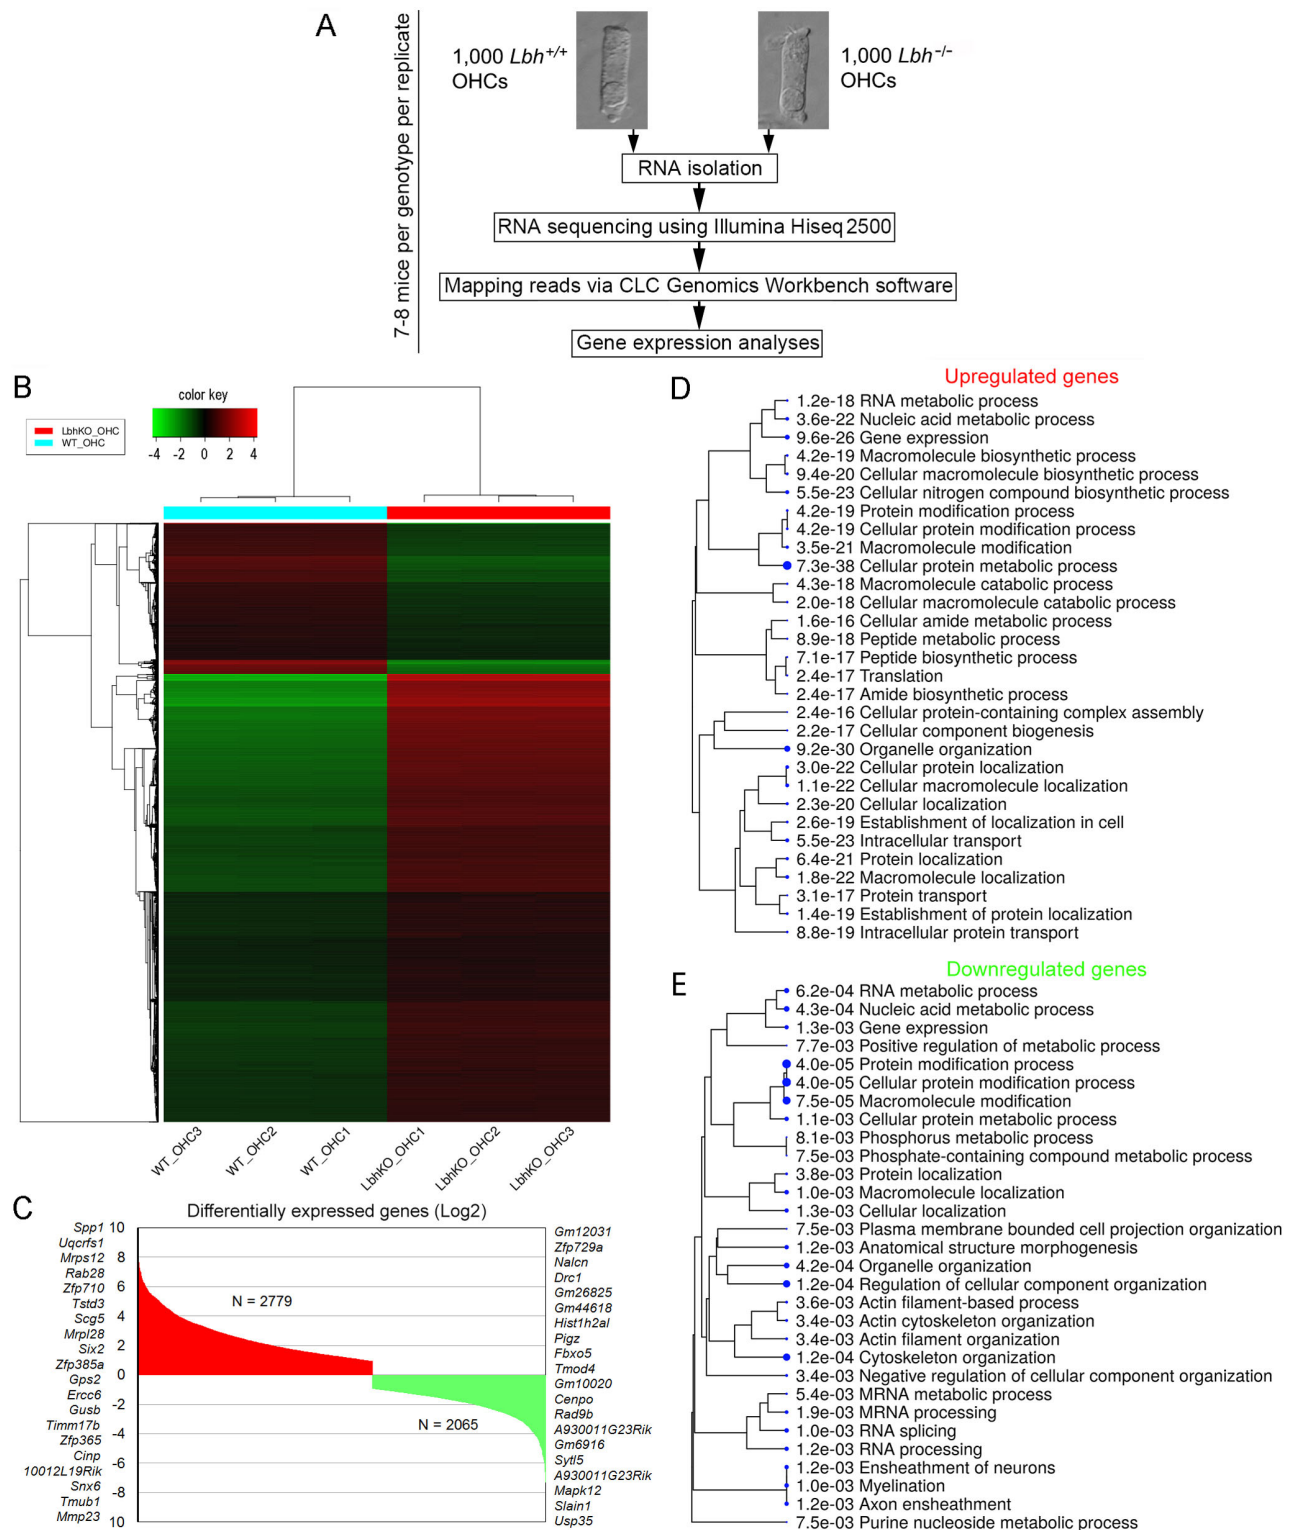

**Fig. 6. RNA-seq transcriptome analysis of *Lbh*<sup>-/-</sup> and *Lbh*<sup>+/+</sup> OHCs.** (A) Workflow of the experimental design for RNA-seq analysis of OHCs isolated from *Lbh*<sup>-/-</sup> and *Lbh*<sup>+/+</sup> mice. (B) Euclidean distance heatmap of 10,000 genes (z-score cutoff=4), depicting the average linkage between genes expressed in *Lbh*<sup>-/-</sup> and *Lbh*<sup>+/+</sup> OHCs. (C) Upregulated and downregulated genes in *Lbh*<sup>-/-</sup> compared to *Lbh*<sup>+/+</sup> OHCs. The top 20 genes upregulated or downregulated are shown on either side of the plot. (D) ShinyGO biological processes enriched in upregulated genes in *Lbh*<sup>-/-</sup> compared to *Lbh*<sup>+/+</sup> OHCs. (E) ShinyGO biological processes enriched in downregulated genes in *Lbh*<sup>-/-</sup> compared to *Lbh*<sup>+/+</sup> OHCs.

OHCs via a feedback mechanism, and that diminished Notch/Wnt activity following LBH ablation, as measured by reduced Wnt/Notch target gene expression in *Lbh*-null OHCs, may lead to OHC

degeneration. In other words, LBH may promote the maintenance of OHCs by regulating Notch and Wnt signaling activity. Similarly, previous studies have also shown that dysregulation of Notch and

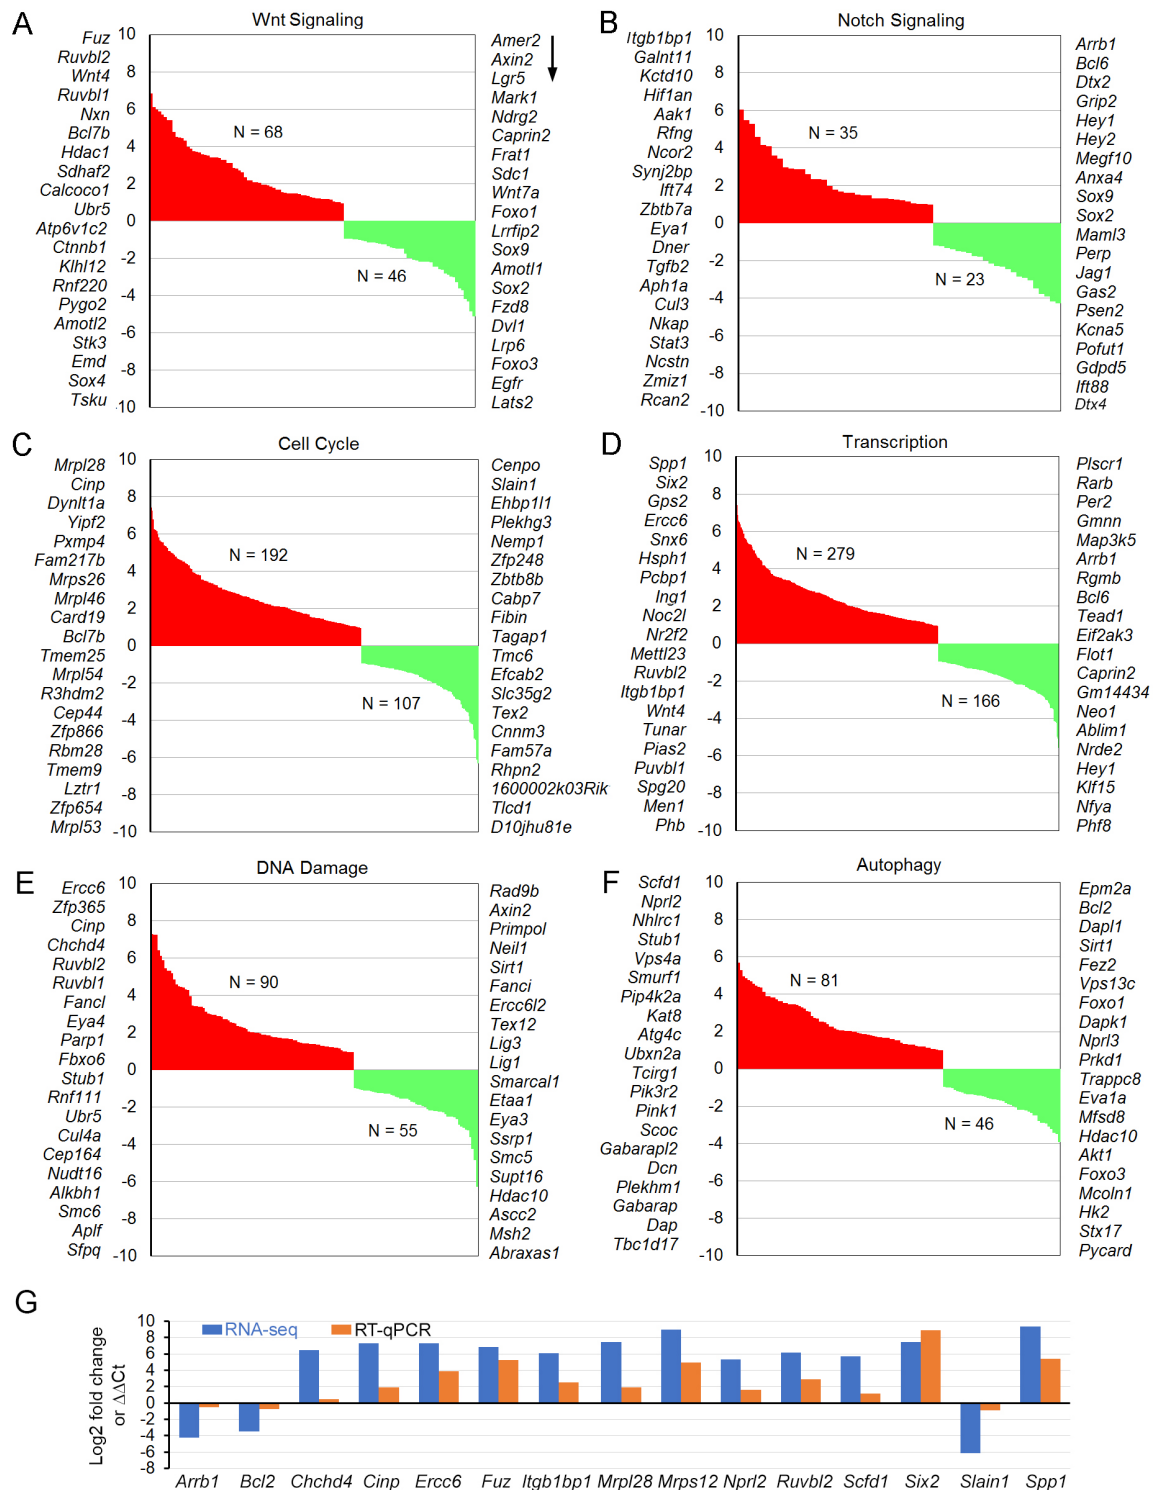

**Fig. 7. GSEA of *Lbh*<sup>-/-</sup> and *Lbh*<sup>+/+</sup> OHCs transcriptomes.** Enriched pathways (FDR <0.25) *Lbh*<sup>-/-</sup> null OHCs include regulation of Wnt signaling (A), Notch signaling (B), cell cycle (C), nucleic acid-templated transcription (D), DNA damage/repair (E) and autophagy (F). The total numbers of upregulated (red) and downregulated (green) genes within each pathway are indicated, and the top 20 genes in each category are listed on either side of the graph, with greatest to least fold change in downward direction (arrow). (G) Validation of differentially expressed cell survival genes using RT-qPCR. Log<sub>2</sub> fold changes (*Lbh*<sup>-/-</sup> versus *Lbh*<sup>+/+</sup>) from RNA-seq and  $\Delta\Delta Ct$  values (normalized to *Actb*) from RT-qPCR for each gene are shown.

Wnt signaling, and alterations in LBH levels can perturb the balance between proliferation, differentiation and maintenance in different tissues (Rieger et al., 2010; Li et al., 2015; Ashad-Bishop et al., 2019).

LBH function as a transcription co-factor has been shown by multiple studies (Briegel and Joyner, 2001; Briegel et al., 2005; Deng et al., 2010; Al-Ali et al., 2010). Co-factors do not bind DNA directly, but rather interact specifically and non-covalently with a

transcription factor to activate or repress the transcription of specific genes. So far, 513 genes are assumed to be co-factors based on the curated GO Molecular Function Annotations dataset (Rouillard et al., 2016). The transcription factor(s) that LBH interacts with are yet to be identified. This study identified 430 and 281 transcription factors being upregulated and downregulated in the *Lbh*<sup>-/-</sup> OHCs, respectively. *Six2*, which is associated with the development of several organs, including kidney, stomach and limb (Self et al., 2006; Kobayashi et al., 2008), is one of the top ten upregulated transcription factors (Fig. 7D,G). *SIX2* has been shown to act through its interaction with TCF7L2 and OSR1 in a canonical Wnt signaling independent manner, preventing transcription of differentiation genes in cap mesenchyme, such as WNT4 (Xu et al., 2014; Park et al., 2012). We note that *Six2* is differentially expressed in OHCs of neonatal and adult mice (Li et al., 2016; Li et al., 2018; Kolla et al., 2020). It is possible that LBH interacts with *SIX2* to alter Notch signaling. Higher expression of *Six2* in OHCs than in IHCs and vestibular HCs may also explain why *Lbh* deletion has a larger effect on OHCs than other HC types.

Although we observed deregulation of Wnt and Notch pathway genes in *Lbh*-null OHCs, many genes that are involved in cell cycle regulation, regulation of nucleic acid-templated transcription, DNA repair/maintenance and autophagy were also de-regulated. Noticeably, *Plekhhg3*, *Hdac1*, *Hdac10*, *Zfp365*, *Ercc6*, *Foxo1*, *Foxo3* and *Bcl2* were among those genes that had expression that was significantly upregulated or downregulated in *Lbh*-null OHCs. PLEKHG3 has been shown to be indispensable for inducing and maintaining cell polarity by promoting Rac small GTPase and actin polymerization (Nguyen et al., 2016). We speculate that *Plekhhg3* may be involved with actin polymerization in the cytoskeleton and stereocilia in HCs. *Hdac1* and *Hdac10* are components of the histone deacetylase complex and play a key role in transcriptional regulation, cell cycle progression and apoptosis. *Zfp365* (ZNF365 in humans) encodes a zinc finger protein that may play a role in the repair of DNA damage and maintenance of genome stability. The encoded protein of *Ercc6* has ATP-stimulated ATPase activity and interacts with several transcription and excision repair proteins. *Foxo1* is the main target of insulin signaling and regulates metabolic homeostasis in response to oxidative stress, whereas *Foxo3* likely functions as a trigger for apoptosis through the expression of genes necessary for cell death. *Bcl2* encodes an integral outer mitochondrial membrane protein that blocks the apoptotic death of some cells, such as lymphocytes. Interestingly, all these genes were also found to be dysregulated in aging HCs (our unpublished observation). Therefore, although we speculate that diminished Notch/Wnt activity is involved in HC degeneration in *Lbh*-null mice, it is also possible that HC degeneration and loss are due to an increased genotoxic and cell stress as a result of a change in metabolic processes, DNA damage/repair and autophagy. Indeed, a recent study showed that LBH is involved in cell cycle regulation and LBH-deficiency induced S-phase arrest, and increased DNA damage in articular cartilage (Matsuda et al., 2017). Cell-based transcriptional reporter assays further indicate LBH may repress the transcriptional activation of p53 (Deng et al., 2010), a key regulator of DNA damage control and apoptosis. Our analyses showed that *Trp53* (p53) was upregulated in *Lbh*-null OHCs (Table S1). We would like to emphasize that cell degeneration and death involve the complex regulation of many genes and pathways turned on or off at different time points. Thus, it is difficult to pinpoint which pathway(s) play a key role in OHC degeneration and loss in *Lbh*-null mice.

LBH is predominantly localized to the nucleus in most cells (Briegel and Joyner, 2001; Briegel et al., 2005; Ai et al., 2008; Lindley

and Briegel, 2013; Lindley et al., 2015; Garikapati et al., 2021 preprint); however, LBH expression in HCs was predominantly cytoplasmic, although weak nuclear LBH positivity was also observed. In fibroblast-like COS-7 cells, co-localization analysis shows that LBH proteins are localized to both the nucleus and the cytoplasm (Briegel and Joyner, 2001; Ai et al., 2008). In postmitotic neurons, LBH is also found to be more cytoplasmic than nuclear (unpublished observation). Some transcriptional co-factors, such as TAZ/YAP, are detected in the cytoplasm and can translocate into the nucleus upon mechanostimulation (Low et al., 2014). For example, the STAT (signal transducer and activator of transcription) transcription factors are constantly shuttling between nucleus and cytoplasm irrespective of cytokine stimulation (Low et al., 2014; Meyer and Vinkemeier, 2004). It is therefore plausible that cytoplasmic LBH in OHCs may translocate to the nucleus when needed. It is also possible that cytoplasmic LBH may interact with different proteins and have a different function than in the nucleus.

Collectively, this is the first study showing that transcription co-factor LBH can influence stereocilia bundle maintenance and the survival of cochlear HCs, especially OHCs. Although the underlying mechanisms of how LBH interacts with transcription factor(s) remain to be further investigated, our analyses showed significant gene enrichment of biological processes related to transcriptional regulation and dysregulation of signaling pathways controlling cell maintenance. Importantly, our work points to LBH as a novel causative factor and putative molecular target in progressive hearing loss. It also identifies LBH as paramount for adult tissue maintenance, which could be exploited therapeutically to slow the onset and progression of HC aging.

## MATERIALS AND METHODS

### *Lbh* knockout mice

Male and female *Lbh*-mutant mice (provided by Dr Karoline Briegel at University of Miami Miller School of Medicine, FL, USA) were used for experiments. Mice with a conditional null allele of *Lbh* were generated by flanking exon 2 with *loxP* sites (*Lbh*<sup>loxP</sup>). *Lbh*<sup>loxP</sup> mice were then crossed with a *Rosa26-Cre* line, resulting in the ubiquitous deletion of exon 2 and the abolishment of LBH protein expression. Details for generating the mice have been described previously (Lindley and Briegel, 2013). Mice homozygous for the *Lbh* null allele were viable and fertile but displayed abnormal mammary gland development after birth (Lindley and Briegel, 2013). All animal experiments were performed according to approved guidelines.

### ABR and DPOAE measurements

ABRs were recorded in response to tone bursts from 4 to 50 kHz using standard procedures described previously (Zhang et al., 2013). Response signals were amplified (100,000×), filtered, averaged and acquired by TDT RZ6 (Tucker-Davis Technologies, Alachua, FL, USA). Threshold is defined visually as the lowest sound pressure level (in decibel) at which any wave (wave I to wave IV) is detected and reproducible above the noise level.

The DPOAE at the frequency of 2f<sub>1</sub>-f<sub>2</sub> was recorded in response to f<sub>1</sub> and f<sub>2</sub>, with f<sub>2</sub>/f<sub>1</sub>=1.2 and the f<sub>2</sub> level 10 dB lower than the f<sub>1</sub> level. The sound pressure obtained from the microphone in the ear canal was amplified and fast Fourier transforms were computed from averaged waveforms of ear canal sound pressure. The DPOAE threshold is defined as the f<sub>1</sub> sound pressure level (measured in decibels) required to produce a response above the noise level at the frequency of 2f<sub>1</sub>-f<sub>2</sub>.

### Recording of CM and EP

Procedures for recording CM and EP have been described previously (Zhang et al., 2014; Liu et al., 2016). A silver electrode was placed on the ridge near the round window for recording CM. An 8 kHz tone burst (90 dB) was delivered through a calibrated TDT MF1 multi-field magnetic speaker. The biological signals were amplified using an Axopatch 200B amplifier (Molecular Devices, Sunnyvale, CA, USA) and acquired by



pClamp 9.2 software (Molecular Devices) running on an IBM-compatible computer. The sampling frequency was 50 kHz.

For recording the EP, a basal turn location was chosen. A hole was made using a fine drill. A glass capillary pipette electrode (10 MΩ) was mounted on a hydraulic micromanipulator and advanced until a stable positive potential was observed. The signals were filtered and amplified under current-clamp mode using an Axopatch 200B amplifier and acquired using pClamp 9.2 software. The sampling frequency was 10 kHz.

### Immunocytochemistry and HC count

The cochlea and vestibule from *Lbh*<sup>-/-</sup> and *Lbh*<sup>+/+</sup> were fixed for 24 h with 4% paraformaldehyde. The basilar member, including the organ of Corti, the utricle and ampulla were dissected out. Antibodies against MYO7A (Proteus, 25-6790, 1:300 dilution) or LBH (Sigma-Aldrich, HPA034669, 1:200 dilution) and secondary antibody (Life Technologies, 1579044, 1:400 dilution) were used. Alexa Fluorescent Phalloidin (Invitrogen, 565227, 1:400 dilution) was used to label F-actin (stereocilia bundles), and DAPI was used to stain nuclei. Tissues were mounted on glass microscopy slides and imaged using a Leica TCS SP8 MP confocal microscope. HC counts from two areas [~1.4 and 4.5 mm from the hook, each 850 μm (425 μm per frame×2) in length] were obtained for HC count from confocal images offline (Liu et al., 2016).

### Scanning electron microscopy

The cochleae from *Lbh*-mutant mice were fixed for 24 h with 2.5% glutaraldehyde in 0.1 M sodium cacodylate buffer (pH 7.4) containing 2 mM CaCl<sub>2</sub> washed in buffer. After the cochlear wall was removed, the cochleae were then post-fixed for 1 h with 1% OsO<sub>4</sub> in 0.1 M sodium cacodylate buffer and washed. The cochleae were dehydrated via an ethanol series, critical point dried from CO<sub>2</sub> and sputter-coated with gold. The morphology of the HCs was examined using a FEI Quanta 200 scanning electron microscope and photographed.

### Whole-cell voltage-clamp techniques for recording MET current and NLC

Details for recording MET currents from auditory sensory epithelium have been described previously (Kros et al., 1992; Jia and He, 2005). A segment of auditory sensory epithelium was prepared from the mid-cochlear and bathed in extracellular solution containing 120 mM NaCl, 20 mM TEA-Cl, 2 mM CoCl<sub>2</sub>, 2 mM MgCl<sub>2</sub>, 10 mM HEPES, and 5 mM glucose (pH 7.4). The patch electrodes were back-filled with internal solution, which contains 140 mM CsCl, 0.1 mM CaCl<sub>2</sub>, 3.5 mM MgCl<sub>2</sub>, 2.5 mM MgATP, 5 mM EGTA-KOH and 10 mM HEPES-KOH. The solution was adjusted to pH 7.4 and the osmolarity was adjusted to 300 mOsm with glucose. The pipettes had initial bath resistances of ~3-5 MΩ. After the whole-cell configuration was established and series resistance was ~70% compensated, the cell was held under voltage-clamp mode to record MET currents in response to bundle deflection by a fluid jet positioned ~10-15 μm away from the bundle. Sinusoidal bursts (100 Hz) with different magnitudes were used to drive the fluid jet as described previously. Holding potential was normally set near -70 mV. The currents (filtered at 2 kHz) were amplified using an Axopatch 200B amplifier and acquired using pClamp 9.2. Data were analyzed using Clampfit in the pClamp software package and Igor Pro (WaveMetrics).

For recording NLC, the cells were bathed in extracellular solution containing 120 mM NaCl, 20 mM TEA-Cl, 2 mM CoCl<sub>2</sub>, 2 mM MgCl<sub>2</sub>, 10 mM HEPES, and 5 mM glucose (pH 7.4). The internal solution contains 140 mM CsCl, 2 mM MgCl<sub>2</sub>, 10 mM EGTA and 10 mM HEPES (pH 7.4). The two-sine voltage stimulus protocol (10 mV peak at both 390.6 and 781.2 Hz) with subsequent fast Fourier transform-based admittance analysis (jClamp, version 15.1, SciSoft) was used to measure membrane capacitance using jClamp software. Fits to the capacitance data were made using IgorPro (WaveMetrics). The maximum charge transferred through the membrane's electric field ( $Q_{max}$ ), the slope factor of the voltage dependence ( $\alpha$ ), the voltage at peak capacitance ( $V_{pkcm}$ ) and the linear membrane capacitance ( $C_{lin}$ ) were calculated.

### Cell isolation, RNA preparation and RNA-seq

Homozygous and wild-type mice at P12 were used for gene expression analysis. Details for cell isolation and collection have been described previously (Li et al., 2018). Approximately 1000 OHCs were collected from

7-8 mice for one biological repeat per genotype. Three biological replicates were prepared for each genotype.

Total RNA, including small RNAs (>~18 nucleotides), were extracted and purified using the Qiagen RNeasy Plus Mini kit (Qiagen, Germantown, MD, USA). To eliminate DNA contamination in the collected RNA, on-column DNase digestion was performed. The quality and quantity of RNA were examined using an Agilent 2100 BioAnalyzer (Agilent, Santa Clara, CA, USA).

Genome-wide transcriptome libraries were prepared from three biological replicates separately for *Lbh*<sup>-/-</sup> and *Lbh*<sup>+/+</sup> OHCs. The SMART-Seq V4 Ultra Low Input RNA kit (Clontech Laboratories, Mountain View, CA, USA) and the Nextera Library preparation kit (Illumina, San Diego, CA, USA) were used. An Agilent 2100 Bioanalyzer and a Qubit fluorometer (Invitrogen, Thermo Fisher Scientific) were used to assess library size and concentration before sequencing. Transcriptome libraries were sequenced using the HiSeq 2500 Sequencing System (Illumina). Four samples per lane were sequenced, generating ~60 million, 100 bp single-end reads per sample. The files from the multiplexed RNA-seq samples were demultiplexed and fastq files were obtained.

The CLC Genomics Workbench software (CLC Bio, Waltham, MA, USA) was used to individually map the reads to the exonic, intronic and intergenic sections of the mouse genome (mm10, build name GRCm38). Gene expression values were normalized as reads per kilobase of transcript per million mapped reads (RPKM). Log fold changes and FDR *P*-values were calculated, and the dataset was exported for further analysis.

### Real-time quantitative PCR for validation

OHCs were collected as described above from 14 additional *Lbh*<sup>-/-</sup> mice and 15 age-matched *Lbh*<sup>+/+</sup> mice for RT-qPCR. Total RNA was isolated using the Qiagen miRNeasy kit and quantified using a nanodrop spectrophotometer. cDNA libraries were prepared from isolated RNA with the iSCRIPT master mix (Bio-Rad). Oligonucleotide primers were acquired from Integrated DNA Technologies (Coralville, IA, USA). The sequences (forward and reverse) of oligonucleotide primers are: *Actb* (5'-GTACTCTGTGTGGATCGGTGG-3', 5'-ACGCAGCTCAGTAACAGTCC-3'), *Arrb1* (5'-AAGGGACACGAGTGTTCAGA-3', 5'-GATCCACAGGACCACACCA-3'), *Bcl2* (5'-GAGTTCGGTGGGGTTCATGTG-3', 5'-AGTTCCACAAGGCATCCCAG-3'), *Chchd4* (5'-CGGGAACAACATGTCTCTACT-3', 5'-GGCAGTATCAACCCGTCTC-3'), *Cimp* (5'-CCATCTGGACGGCTTGACTA-3', 5'-ACGTGTGAAATAGAGGGGGC-3'), *Ercc6* (5'-TGAGCAGGTCTTATTTTGGCCG-3', 5'-AAAGAGGTCAGGGTGGTTGC-3'), *Fuz* (5'-CTGAAGAAAGAATTGAGGGCCAG-3', 5'-CCTCTGCAAACCTGAAAGG-3'), *Igf1bpl* (5'-ACACTTGTTCCACTGCGG-3', 5'-CCACAGACTTGCTCTTTGTACTG-3'), *Mrrpl28* (5'-CACTCGGGAGCTTACAGTGA-3', 5'-GCTTCAGGTCCATGCCAAAC-3'), *Mrps12* (5'-CCGCTAGGTTGGTGAGGTG-3', 5'-AACAGAAAGTCCCCTCGCA-3'), *Npr12* (5'-CTGTCTACGTCCAAAGCA-3', 5'-CTGGATCAGCTTCCTTCATCA-3'), *Ruvbl2* (5'-CACACCATTACAGCCATCG-3', 5'-CTCTGTCTCCTTGTATCCG-3'), *Scfd1* (5'-CGTCCGAGGTTGATTTGGAG-3', 5'-TAGTGTTCCTGTAGTGGA-3'), *Six2* (5'-CGCAAGTCAACTGGTTC-3', 5'-GAACTGCCTAGCACCGACTT-3'), *Slain1* (5'-TCAAGCCTTATAGCAATGGCA-3', 5'-ACTGTCTGATGGATGACTGCG-3'), *Spp1* (5'-ATCCTTGCTGGGTTTGCAG-3', 5'-TGGTCTGATGATCCCTCAGA-3'), *Uqcrf51* (5'-TTCTGGATGTGAAGCGACCC-3', 5'-CAGAGAAGTCGGGCACCTTG-3'), *Zfp365* (5'-GAAGCCCAGATGCCTAAGCC-3', 5'-GACTACCGGTTTCGTGAAT-3').

RT-qPCR reactions were prepared as 10 μl reactions, including *Lbh*<sup>-/-</sup> or *Lbh*<sup>+/+</sup> OHC cDNA, PowerUp SYBR green master mix (Thermo Fisher Scientific), gene-specific forward and reverse primers, and run in triplicate on a Bio-Rad CFX96 Touch real-time PCR machine. Primer specificity was confirmed by melt curve analysis. Quantified expression (Ct) of each gene (gene of interest or GOI) was normalized to the Ct value of a housekeeping gene (*Actb*) [ $\Delta Ct = Ct^{(GOI)} - Ct^{(AVG Actb)}$ ]. Then differential expression of the gene between *Lbh*<sup>-/-</sup> and *Lbh*<sup>+/+</sup> OHCs was calculated as  $\Delta\Delta Ct$  ( $\Delta\Delta Ct = \Delta Ct^{Lbh^{-/-}} - \Delta Ct^{Lbh^{+/+}}$ ). The relationships between the RNA-seq derived-log<sub>2</sub> fold change values and  $\Delta\Delta Ct$  values from RT-qPCR between *Lbh*<sup>-/-</sup> and *Lbh*<sup>+/+</sup> OHCs were compared to confirm trends in expression.

### Bioinformatic analyses

The expressed genes were examined for enrichment using Broad Institute GSEA v. 3.0 (Mootha et al., 2003; Subramanian et al., 2005), iDEP 0.85 and ShinyGO (Ge-lab.org) (Ge et al., 2018). Enriched biological processes and molecular functions, classified according to gene ontology terms, as well as signaling pathways in the *Lbh*<sup>-/-</sup> and *Lbh*<sup>+/+</sup> OHCs were examined (FDR cutoff <0.05). With the RPKM expression value arbitrarily set at  $\geq 0.10$  (FDR,  $P \leq 0.05$ ), expression values from *Lbh*<sup>-/-</sup> and *Lbh*<sup>+/+</sup> OHCs were inputted into iDEP for analysis and log transformed. For reference and verification, additional resources, such as the Ensembl database, AmiGO (<http://amigo.geneontology.org/amigo>), gEAR ([www.umgear.org](http://www.umgear.org)) and SHIELD (<https://shield.hms.harvard.edu/index.html>), were also used. No custom code was used in the analysis.

### Statistical analysis

Mean $\pm$ s.d. was calculated based on measurements from three different types of mice. Student's *t*-test was used to determine statistical significance between two different conditions or two genotypes for each parameter. Two-way ANOVA with multiple *t*-tests using the Holm–Sidak correction for multiple comparisons was also used to determine statistical significance.  $P \leq 0.05$  was regarded as significant. For transcriptome analysis, mean $\pm$ s.d. was calculated for three biological repeats from *Lbh*<sup>-/-</sup> and *Lbh*<sup>+/+</sup> OHCs. ANOVA FDR-corrected *P*-values were used to compare average expression (RPKM) values for each transcript and a FDR of  $P < 0.05$  was considered statistically significant.

### Acknowledgements

We thank the University of Nebraska DNA Sequencing Core Facility for performing RNA-seq. The University of Nebraska DNA Sequencing Core and Imaging Core receive partial support from the National Center for Research Resources (RR018788). We also thank Tom Bargar and Nicholas Conoan of the Electron Microscopy Core Facility at the University of Nebraska Medical Center for technical assistance. The facility is supported by state funds from the Nebraska Research Initiative and the University of Nebraska Foundation, and institutionally by the Office of the Vice Chancellor for Research.

### Competing interests

The authors declare no competing or financial interests.

### Author contributions

Conceptualization: K.J.B., D.Z.H.; Methodology: H.L., M.G., S.W.M., Y.L., X.L., K.J.B., D.Z.H.; Validation: K.P.G., S.W.M., Y.L.; Formal analysis: K.P.G., Y.L., K.J.B., D.Z.H.; Investigation: H.L., M.G., K.J.B., D.Z.H.; Resources: X.L.; Data curation: H.L., K.P.G.; Writing - original draft: D.Z.H.; Writing - review & editing: K.J.B., D.Z.H.; Supervision: K.J.B., D.Z.H.; Funding acquisition: K.J.B., D.Z.H.

### Funding

This work was supported by National Institutes of Health grants from the National Institute on Deafness and Other Communication Disorders (R01 DC016807 to D.Z.H., and R01 DC005575 to X.L.) and the National Institute of General Medical Sciences (R01 GM113256 to K.J.B.). Y.L. is supported by the National Science Foundation of China (81600798 and 81770996). Deposited in PMC for release after 12 months.

### Data availability

The raw RNA-seq data of P12 OHCs from *Lbh*<sup>-/-</sup> and *Lbh*<sup>+/+</sup> mice are available from the National Center for Biotechnology Information Sequence Read Archive under accession SRP212389. The project metadata is available under BioProject accession PRJNA552016.

### Supplementary information

Supplementary information available online at <https://jcs.biologists.org/lookup/doi/10.1242/jcs.254458.supplemental>

### Peer review history

The peer review history is available online at <https://journals.biologists.com/jcs/article-lookup/134/7/jcs254458/>

### References

Ai, J., Wang, Y., Tan, K., Deng, Y., Luo, N., Yuan, W., Wang, Z., Li, Y., Wang, Y., Mo, X. et al. (2008). A human homolog of mouse *Lbh* gene, *hLBH*, expresses in heart and activates SRE and AP-1 mediated MAPK signaling pathway. *Mol. Biol. Rep.* **35**, 179–187. doi:10.1007/s11033-007-9068-4

Al-Ali, H., Rieger, M. E., Seldeen, K. L., Harris, T. K., Farooq, A. and Briegel, K. J. (2010). Biophysical characterization reveals structural disorder in the developmental transcriptional regulator LBH. *Biochem. Biophys. Res. Commun.* **391**, 1104–1109. doi:10.1016/j.bbrc.2009.12.032

Ashad-Bishop, K., Garikapati, K., Lindley, L. E., Jorda, M. and Briegel, K. J. (2019). Loss of Limb-Bud-and-Heart (LBH) attenuates mammary hyperplasia and tumor development in MMTV-Wnt1 transgenic mice. *Biochem. Biophys. Res. Commun.* **508**, 536–542. doi:10.1016/j.bbrc.2018.11.155

Ashmore, J. F. (1989). Motor coupling in mammalian outer hair cells. In *Cochlear Mechanisms* (ed. J. P. Wilson and D. T. Kemp), pp. 107–114. New York: Plenum.

Briegel, K. J. and Joyner, A. L. (2001). Identification and characterization of *Lbh*, a novel nuclear protein expressed during early limb and heart development. *Dev. Biol.* **233**, 291–304. doi:10.1006/dbio.2001.0225

Briegel, K. J., Baldwin, H. S., Epstein, J. A. and Joyner, A. L. (2005). Congenital heart disease reminiscent of partial trisomy 2p syndrome in mice transgenic for the transcription factor *Lbh*. *Development* **132**, 3305–3316. doi:10.1242/dev.01887

Brownell, W. E., Bader, C. R., Bertrand, D. and de Ribaupierre, Y. (1985). Evoked mechanical responses of isolated cochlear outer hair cells. *Science* **227**, 194–196. doi:10.1126/science.3966153

Cai, T., Jen, H.-I., Kang, H., Klisch, T. J., Zoghbi, H. Y. and Groves, A. K. (2015). Characterization of the transcriptome of nascent hair cells and identification of direct targets of the *Atoh1* transcription factor. *J. Neurosci.* **35**, 5870–5883. doi:10.1523/JNEUROSCI.5083-14.2015

Conen, K. L., Nishimori, S., Provot, S. and Kronenberg, H. M. (2009). The transcriptional cofactor *Lbh* regulates angiogenesis and endochondral bone formation during fetal bone development. *Dev. Biol.* **333**, 348–358. doi:10.1016/j.ydbio.2009.07.003

Dallos, P. (1992). The active cochlea. *J. Neurosci.* **12**, 4575–4585. doi:10.1523/JNEUROSCI.12-12-04575.1992

Dallos, P., Wu, X., Cheatham, M. A., Gao, J., Zheng, J., Anderson, C. T., Jia, S., Wang, X., Cheng, W. H. Y., Sengupta, S. et al. (2008). Prestin-based outer hair cell motility is necessary for mammalian cochlear amplification. *Neuron* **58**, 333–339. doi:10.1016/j.neuron.2008.02.028

Deng, Y., Li, Y., Fan, X., Yuan, W., Xie, H., Mo, X., Yan, Y., Zhou, J., Wang, Y., Ye, X. et al. (2010). Synergistic efficacy of LBH and  $\alpha$ B-crystallin through inhibiting transcriptional activities of p53 and p21. *BMB Rep.* **43**, 432–437. doi:10.5483/BMBRep.2010.43.6.432

Ebeid, M., Sripal, P., Pecka, J., Beisel, K. W., Kwan, K. and Soukup, G. A. (2017). Transcriptome-wide comparison of the impact of *Atoh1* and miR-183 family on pluripotent stem cells and multipotent otic progenitor cells. *PLoS ONE* **12**, e0180855. doi:10.1371/journal.pone.0180855

Elkon, R., Milon, B., Morrison, L., Shah, M., Vijayakumar, S., Racherla, M., Leitch, C. C., Silipino, L., Hadi, S., Weiss-Gayet, M. et al. (2015). RFX transcription factors are essential for hearing in mice. *Nat. Commun.* **6**, 8549. doi:10.1038/ncomms9549

Fettiplace, R. (2017). Hair cell transduction, tuning, and synaptic transmission in the mammalian cochlea. *Compr. Physiol.* **7**, 1197–1227. doi:10.1002/cphy.c160049

Garikapati, K., Ashad-Bishop, K., Hong, S., Qureshi, R., Rieger, M. E., Lindley, L. E., Wang, B., Azzam, D. J., Khanlari, M., Nadji, M. et al. (2021). LBH is a cancer stem cell- and metastasis-promoting oncogene essential for WNT stem cell function in breast cancer. *bioRxiv* 2021.01.29.428659. doi:10.1101/2021.01.29.428659

Ge, S. X., Son, E. W. and Yao, R. (2018). iDEP: an integrated web application for differential expression and pathway analysis of RNA-seq data. *BMC Bioinformatics* **19**, 534. doi:10.1186/s12859-018-2486-6

He, D. Z. Z. (1997). Relationship between the development of outer hair cell electromotility and efferent innervation: a study in cultured organ of corti of neonatal gerbils. *J. Neurosci.* **17**, 3634–3643. doi:10.1523/JNEUROSCI.17-10-03634.1997

He, D. Z. Z., Evans, B. N. and Dallos, P. (1994). First appearance and development of electromotility in neonatal gerbil outer hair cells. *Hear. Res.* **78**, 77–90. doi:10.1016/0378-5955(94)90046-9

He, D. Z. Z., Jia, S., Sato, T., Zuo, J., Andrade, L. R., Riordan, G. P. and Kachar, B. (2010). Changes in plasma membrane structure and electromotile properties in prestin deficient outer hair cells. *Cytoskeleton* **67**, 43–55. doi:10.1002/cm.20423

He, D. Z. Z., Lovas, S., Ai, Y., Li, Y. and Beisel, K. W. (2014). Prestin at year 14: progress and prospect. *Hear. Res.* **311**, 25–35. doi:10.1016/j.heares.2013.12.002

Hudspeth, A. J. (2014). Integrating the active process of hair cells with cochlear function. *Nat. Rev. Neurosci.* **15**, 600–614. doi:10.1038/nrn3786

Jia, S. and He, D. Z. Z. (2005). Motility-associated hair-bundle motion in mammalian outer hair cells. *Nat. Neurosci.* **8**, 1028–1034. doi:10.1038/nn1509

Jia, S., Yang, S., Guo, W. and He, D. Z. Z. (2009). Fate of mammalian cochlear hair cells and stereocilia after loss of the stereocilia. *J. Neurosci.* **29**, 15277–15285. doi:10.1523/JNEUROSCI.3231-09.2009

Kiernan, A. E. (2013). Notch signaling during cell fate determination in the inner ear. *Semin. Cell Dev. Biol.* **24**, 470–479. doi:10.1016/j.semdcb.2013.04.002

Kobayashi, A., Valerius, M. T., Mugford, J. W., Carroll, T. J., Self, M., Oliver, G. and McMahon, A. P. (2008). Six2 defines and regulates a multipotent self-renewing nephron progenitor population throughout mammalian kidney development. *Cell Stem Cell* **3**, 169–181. doi:10.1016/j.stem.2008.05.020

- Kolla, L., Kelly, M. C., Mann, Z. F., Anaya-Rocha, A., Ellis, K., Lemons, A., Palwerno, A. T., So, K. S., Mays, J. C., Orvis, J. et al. (2020). Characterization of the development of the mouse cochlear epithelium at the single cell level. *Nat. Commun.* **11**, 2389. doi:10.1038/s41467-020-16113-y
- Kros, C. J., Rüscher, A. and Richardson, G. P. (1992). Mechano-electrical transducer currents in hair cells of the cultured neonatal mouse cochlea. *Proc. R. Soc. Biol. Sci.* **249**, 185-193. doi:10.1098/rspb.1992.0102
- Li, W.-H., Zhou, L., Li, Z., Wang, Y., Shi, J.-T., Yang, Y.-J. and Gui, J.-F. (2015). Zebrafish Lbh-like is required for Otx2-mediated photoreceptor differentiation. *Int. J. Biol. Sci.* **11**, 688-700. doi:10.7150/ijbs.11244
- Li, Y., Liu, H., Giffen, K. P., Chen, L., Beisel, K. W. and He, D. Z. Z. (2018). Transcriptomes of cochlear inner and outer hair cells from adult mice. *Sci. Data* **5**, 180199. doi:10.1038/sdata.2018.199
- Li, Y., Liu, H., Barta, C. L., Judge, P. D., Zhao, L., Zhang, W. J., Gong, S., Beisel, K.W. and He, D.Z. (2016). Transcription factors expressed in mouse cochlear inner and outer hair cells. *PLoS ONE* **11**, e0151291. doi:10.1371/journal.pone.0151291
- Liberman, M. C., Gao, J., He, D. Z. Z., Wu, X., Jia, S. and Zuo, J. (2002). Prestin is required for electromotility of the outer hair cell and for the cochlear amplifier. *Nature* **419**, 300-304. doi:10.1038/nature01059
- Lindley, L. E. and Briegel, K. J. (2013). Generation of mice with a conditional Lbh null allele. *Genesis* **51**, 491-497. doi:10.1002/dvg.22390
- Lindley, L. E., Curtis, K. M., Sanchez-Mejias, A., Rieger, M. E., Robbins, D. J. and Briegel, K. J. (2015). The WNT-controlled transcriptional regulator LBH is required for mammary stem cell expansion and maintenance of the basal lineage. *Development* **142**, 893-904. doi:10.1242/dev.110403
- Liu, H., Pecka, J. L., Zhang, Q., Soukup, G. A., Beisel, K. W. and He, D. Z. Z. (2014). Characterization of transcriptomes of cochlear inner and outer hair cells. *J. Neurosci.* **34**, 11085-11095. doi:10.1523/JNEUROSCI.1690-14.2014
- Liu, H., Li, Y., Chen, L., Zhang, Q., Pan, N., Nichols, D. H., Zhang, W. J., Fritsch, B. and He, D. Z. Z. (2016). Organ of Corti and stria vascularis: is there an interdependence for survival? *PLoS ONE* **11**, e0168953. doi:10.1371/journal.pone.0168953
- Liu, H., Chen, L., Giffen, K. P., Stringham, S. T., Li, Y., Judge, P. D., Beisel, K. W. and He, D. Z. Z. (2018). Cell-specific transcriptome analysis shows that adult pillar and Deiters' cells express genes encoding machinery for specializations of cochlear hair cells. *Front. Mol. Neurosci.* **11**, 356. doi:10.3389/fnmol.2018.00356
- Low, B. C., Pan, C. Q., Shivashankar, G. V., Bershadsky, A., Sudol, M. and Sheetz, M. (2014). YAP/TAZ as mechanosensors and mechanotransducers in regulating organ size and tumor growth. *FEBS Lett.* **588**, 2663-2670. doi:10.1016/j.febslet.2014.04.012
- Matsuda, S., Hammaker, D., Topolewski, K., Briegel, K. J., Boyle, D. L., Dowdy, S., Wang, W. and Firestein, G. S. (2017). Regulation of the cell cycle and inflammatory arthritis by the transcription cofactor LBH gene. *J. Immunol.* **199**, 2316-2322. doi:10.4049/jimmunol.1700719
- Meyer, T. and Vinkemeier, U. (2004). Nucleocytoplasmic shuttling of STAT transcription factors. *Eur. J. Biochem.* **271**, 4606-4612. doi:10.1111/j.1432-1033.2004.04423.x
- Mootha, V. K., Lindgren, C. M., Eriksson, K.-F., Subramanian, A., Sihag, S., Lehar, J., Pujgserver, P., Carlsson, E., Ridderstrale, M., Laurila, E. et al. (2003). PGC-1 $\alpha$ -responsive genes involved in oxidative phosphorylation are coordinately downregulated in human diabetes. *Nat. Genet.* **34**, 267-273. doi:10.1038/ng1180
- Nguyen, T. T. T., Park, W. S., Park, B. O., Kim, C. Y., Oh, Y., Kim, J. M., Choi, H., Kyung, T., Kim, C.-H., Lee, G. et al. (2016). PLEKHG3 enhances polarized cell migration by activating actin filaments at the cell front. *Proc. Natl. Acad. Sci. USA* **113**, 10091-10096. doi:10.1073/pnas.1604720113
- Park, J.-S., Ma, W., O'Brien, L. L., Chung, E., Guo, J.-J., Cheng, J.-G., Valerius, M. T., McMahon, J. A., Wong, H. W. and McMahon, A. P. (2012). Six2 and Wnt regulate self-renewal and commitment of nephron progenitors through shared gene regulatory networks. *Dev. Cell* **23**, 637-651. doi:10.1016/j.devcel.2012.07.008
- Raft, S. and Groves, A. K. (2015). Segregating neural and mechanosensory fates in the developing ear: patterning, signaling, and transcriptional control. *Cell Tissue Res.* **359**, 315-332. doi:10.1007/s00441-014-1917-6
- Ranum, P. T., Goodwin, A. T., Yoshimura, H., Kolbe, D. L., Walls, W. D., Koh, J.-Y., He, D. Z. and Smith, R. J. H. (2019). Insights into the biology of hearing and deafness revealed by single-cell RNA sequencing. *Cell Rep.* **26**, 3160-3171.e3. doi:10.1016/j.celrep.2019.02.053
- Rieger, M. E., Sims, A. H., Coats, E. R., Clarke, R. B. and Briegel, K. J. (2010). The embryonic transcription cofactor LBH is a direct target of the Wnt signaling pathway in epithelial development and in aggressive basal subtype breast cancers. *Mol. Cell Biol.* **30**, 4267-4279. doi:10.1128/MCB.01418-09
- Rouillard, A. D., Gundersen, G. W., Fernandez, N. F., Wang, Z., Monteiro, C. D., McDermott, M. G. and Ma'ayan, A. (2016). The harmonizome: a collection of processed datasets gathered to serve and mine knowledge about genes and proteins. *Database* **2016**, baw100. doi:10.1093/database/baw100
- Santos-Sacchi, J. (1991). Reversible inhibition of voltage-dependent outer hair cell motility and capacitance. *J. Neurosci.* **11**, 3096-3110. doi:10.1523/JNEUROSCI.11-10-03096.1991
- Scheffer, D. I., Shen, J., Corey, D. P. and Chen, Z.-Y. (2015). Gene expression by mouse inner ear hair cells during development. *J. Neurosci.* **35**, 6366-6380. doi:10.1523/JNEUROSCI.5126-14.2015
- Self, M., Lagutin, O. V., Bowling, B., Hendrix, J., Cai, Y., Dressler, G. R. and Oliver, G. (2006). Six2 is required for suppression of nephrogenesis and progenitor renewal in the developing kidney. *EMBO J.* **25**, 5214-5228. doi:10.1038/sj.emboj.7601381
- Subramanian, A., Tamayo, P., Mootha, V. K., Mukherjee, S., Ebert, B. L., Gillette, M. A., Paulovich, A., Golub, T. R., Lander, E. S. and Mesirov, J. P. (2005). Gene set enrichment analysis: a knowledge-based approach for interpreting genome-wide expression profiles. *Proc. Natl. Acad. Sci. USA* **102**, 15545-15550. doi:10.1073/pnas.0506580102
- Waqas, M., Zhang, S., He, Z., Tang, M. and Chai, R. (2016). Role of Wnt and Notch signaling in regulating hair cell regeneration in the cochlea. *Front. Med.* **10**, 237-249. doi:10.1007/s11684-016-0464-9
- Xu, J., Liu, H., Park, J.-S., Lan, Y. and Jiang, R. (2014). Osr1 acts downstream of and interacts synergistically with Six2 to maintain nephron progenitor cells during kidney organogenesis. *Development* **141**, 1442-1452. doi:10.1242/dev.103283
- Yamaguchi-Kabata, Y., Morihara, T., Ohara, T., Ninomiya, T., Takahashi, A., Akatsu, H., Hashizume, Y., Hayashi, N., Shigemizu, D., Boroevich, K. A. et al. (2018). Integrated analysis of human genetic association study and mouse transcriptome suggests LBH and SHF genes as novel susceptible genes for amyloid- $\beta$  accumulation in Alzheimer's disease. *Hum. Genet.* **137**, 521-533. doi:10.1007/s00439-018-1906-z
- Yamashita, T., Zheng, F., Finkelstein, D., Kellard, Z., Carter, R., Rosencrance, C. D., Sugino, K., Easton, J., Gawad, C. and Zuo, J. (2018). High-resolution transcriptional dissection of in vivo Atoh1-mediated hair cell conversion in mature cochlea identifies Isl1 as a co-reprogramming factor. *PLoS Genet.* **14**, e1007552. doi:10.1371/journal.pgen.1007552
- Zhang, Q., Liu, H., McGee, J., Walsh, E. J., Soukup, G. A. and He, D. Z. Z. (2013). Identifying microRNAs involved in degeneration of the organ of corti during age-related hearing loss. *PLoS ONE* **8**, e62786. doi:10.1371/journal.pone.0062786
- Zhang, Q., Liu, H., Soukup, G. A. and He, D. Z. Z. (2014). Identifying microRNAs involved in aging of the lateral wall of the cochlear duct. *PLoS ONE* **9**, e112857. doi:10.1371/journal.pone.0112857
- Zheng, J., Shen, W., He, D. Z. Z., Long, K. B., Madison, L. D. and Dallos, P. (2000). Prestin is the motor protein of cochlear outer hair cells. *Nature* **405**, 149-155. doi:10.1038/35012009
